# Supplementary material for: Taxonomic and functional shifts in the beech rhizosphere microbiome across a natural soil toposequence
Source: PubMed Central journal article supplement (PMC5574896; doi:10.1038/s41598-017-07639-1), 2017-08-29
Supplement: 41598_2017_7639_MOESM1_ESM.pdf [file 41598_2017_7639_MOESM1_ESM.pdf]

## SUPPLEMENTARY MATERIALS AND METHODS

**Title: Taxonomic and functional shifts in the beech rhizosphere microbiome across a natural soil toposequence**

**AUTHORS:** Colin, Y.<sup>1,2</sup>, Nicolitch<sup>1,2</sup>, O., Van Nostrand<sup>3</sup>, J.D., Zhou<sup>3,4,5</sup>, J.Z., Turpault, M-P.<sup>1,2</sup>, Uroz, S.<sup>1,2\*</sup>

<sup>1</sup> INRA, Université de Lorraine, UMR 1136 “Interactions Arbres Micro-organismes”, Centre INRA de Nancy, 54280 Champenoux, France

<sup>2</sup> INRA UR 1138 “Biogéochimie des Ecosystèmes Forestiers”, Centre INRA de Nancy, 54280 Champenoux, France.

<sup>3</sup> Institute for Environmental Genomics, and Department of Microbiology and Plant Biology, University of Oklahoma, Norman, OK 73072, USA.

<sup>4</sup> Earth Sciences Division, Lawrence Berkeley National Laboratory, Berkeley, CA 94720, USA.

<sup>5</sup> State Key Joint Laboratory of Environment Simulation and Pollution Control, School of Environment, Tsinghua University, Beijing 100084, China.

Running title: Beech rhizosphere microbiome

\* Corresponding author: Mailing address: INRA-Université de Lorraine, Interactions Arbres Micro-organismes, UMR 1136, 54280 Champenoux, France. Phone: +33 (0)3 83 39 40 81, Fax: +33 (0)3 83 39 40 69. E-mail: [uroz@nancy.inra.fr](mailto:uroz@nancy.inra.fr)

## GeoChip analysis

A total of three replicates ( $n=3$ ) coming from each plot and each soil compartment (bulk soil and rhizosphere;  $n$  total=18) were used to perform GeoChip analyses. The gene array used (180K GeoChip 5.0) contains 167,044 distinct probes targeting functional genes involved in microbial carbon (degradation, fixation, methane), nitrogen, sulfur, and phosphorus cycling, energy metabolism, metal homeostasis, organic remediation, "Other" (phylogenetic genes and CRISPR system), secondary metabolism (e.g. antibiotic metabolism, pigments), stress responses, viruses (both bacteriophages and eukaryotic viruses), and virulence. All procedures were performed at Glomics Inc. (Norman, Oklahoma, USA). For each replicate considered, a total of 20 ng of DNA of the required quality ( $A_{260}:A_{280} = 1.8$ ;  $A_{260}:A_{230} = 1.7$ ) was amplified using the Templiphi kit (GE Healthcare) with the following modifications. Spermidine (0.1 mM) and single stranded binding protein ( $267 \text{ ng}\cdot\text{mL}^{-1}$ ) were added to improve the amplification efficiency (Wu et al., 2006). Reactions were scaled down to 10  $\mu\text{L}$  of sample and reaction buffers and 0.6  $\mu\text{L}$  of enzyme. Samples were amplified for 6 hr. Amplified DNA ( $\sim 2 \mu\text{g}$ ) was mixed with 5.5  $\mu\text{L}$  random primers (Life Technologies, random hexamers,  $3 \mu\text{g}/\mu\text{L}$ ), brought to 35  $\mu\text{L}$  with nuclease-free water, heated to  $99^\circ\text{C}$  for 5 min, and immediately placed on ice. The labeling master mix {15  $\mu\text{L}$  [2.5  $\mu\text{L}$  of dNTP (5 mM dAGC-TP, 2.5 mM dTTP), 0.5  $\mu\text{L}$  of Cy-3 dUTP (25 nM; GE Healthcare), 1  $\mu\text{L}$  of Klenow (imer; San Diego, CA;  $40 \text{ U}\cdot\text{mL}^{-1}$ ), 5  $\mu\text{L}$  Klenow buffer, 2.5  $\mu\text{L}$  of water]} was added and the samples were incubated at  $37^\circ\text{C}$  for 6 h in a thermocycler and then at  $95^\circ\text{C}$  for 3 min to inactivate the enzyme. After the addition of Cy3, samples were protected from the light as much as possible. Labeled DNA was cleaned using a QIAquick purification kit (Qiagen) per the manufacturer's instructions and then dried down in a SpeedVac ( $45^\circ\text{C}$ , 45 min; ThermoSavant). Labeled DNA was rehydrated with 27.5  $\mu\text{L}$  deionized water and then hybridization solution was added [99.4  $\mu\text{L}$ ; 63.5  $\mu\text{L}$  2X Hi-RPM hybridization buffer (Agilent), 12.7  $\mu\text{L}$  pre-prepared 10X CGH blocking agent (Agilent), 12.7  $\mu\text{L}$  formamide, 5.5  $\mu\text{L}$  Cot-1 DNA, common oligo reference standard (Liang et al., 2010), mixed well, spun to collect liquid in bottom of tube, and incubated at  $95^\circ\text{C}$  for 5 min. Tubes were incubated at  $37^\circ\text{C}$  for 30 min. Gasket slides were placed into a SureHyb chamber, the samples (120  $\mu\text{L}$ ) were loaded onto the gasket slide. Samples were hybridized for 20-22 hr at  $67^\circ\text{C}$ . After hybridization, slides were disassembled in room temperature Wash Buffer 1 (Agilent) and then dried. GeoChips were imaged (NimbleGen MS 200 microarray scanner) as a Multi-TIFF. The GeoChip data were then extracted using the Agilent Feature Extraction program and loaded onto the GeoChip data analysis pipeline ([ieg.ou.edu/microarray/](http://ieg.ou.edu/microarray/)). Data normalization and quality filtering were performed with multiple steps (Liang et al., 2010; Deng and He, 2014). First, the average signal intensity was calculated for each array, and the maximum average value was applied to normalize the signal intensity of samples in each array. Second, the sum of the signal intensity of samples was calculated for each array, and the

maximum sum value was applied to normalize the signal intensity of all spots in an array, which produced a normalized value for each spot in each array. Spots were scored as positive and retained if the signal-to-noise ratio [SNR = (signal mean – background mean)/background standard deviation] was  $\geq 2.0$ , and the coefficient of variation (CV) of the background was  $< 0.8$ . In addition, spots with signal intensity less than 250 were discarded. Spots that were detected in only one of the biological replicates were also removed.

**Deng Y, He Z.** (2014). Microarray Data Analysis. In: He Z (ed) *Microarrays: Current Technology, Innovations and Applications*. Horizon Scientific Press: Norwich, UK).

**Liang, Y.T., Z. H. He, L. Y. Wu, Y. Deng, G.H. Li, and J.-Z. Zhou.** (2010). Development of a Common Oligonucleotide Reference Standard for microarray data normalization and comparison across different microbial communities. *Appl. Environ. Microbiol.* 76(4):1088-94. doi:10.1128/AEM.02749-09

**Wu, L., Liu, X., Schadt, C.W., and Zhou, J.** (2006) Microarray-based analysis of subnanogram quantities of microbial community DNAs by using whole-community genome amplification. *Appl Environ Microbiol* 72: 4931–4941.

### **Accession number**

The 454 pyrosequencing data generated for this study were submitted to the Sequence Read Archive (SRA) and are available under the Bioproject ID: PRJNA270036 and accession numbers SAMN04103543- SAMN034103566. The microarray data presented here are available for download at <http://ieg.ou.edu/4download/>

**Figure.S1 Principal component analysis (PCA) of the carbon substrates utilization pattern by total microbial communities.** (A) PCA-ordination plots. PCA-ordination plots have been generated for the bulk soil and rhizosphere microbial communities based on their substrate utilization profile. The origins of samples are indicated as follows: filled squares, bulk soil samples from Cambisol Calcaric; open squares, rhizosphere samples from Cambisol Calcaric; filled circles, bulk soil samples from Cambisol Eutric, open circles, rhizosphere samples from Cambisol Eutric; filled triangles, bulk soil samples from Cambisol Hyperdystric; open triangles, rhizosphere samples from Cambisol Hyperdystric. Ellipses correspond to 95% confidence intervals about the mean. B) Vectors show the direction of maximum change for variables and longer arrows indicate a greater change in substrate utilization value. Substrates abbreviations used are: PAME, pyruvic acid methyl ester; tween 40, tween 40; tween 80, tween 80;  $\alpha$ -cyclodextrin, alpha-cyclodextrin; glycogen, glycogen; D-cellubiose, D-cellubiose;  $\alpha$ -D-Lactose, alpha-D-Lactose; BMetDGlc, beta-methyl-D-glucoside; D-xylose, D-xylose; i-Erythritol, i-Erythritol; D-Mannitol, D-Mannitol; NADG, N-Acetyl-D-Glucosamine; DGlcA, D-Glucosaminidic acid; Glc1P, Glucose 1 phosphate; GP, Glycerol phosphate; DGAGL, D-galactonique acid gamma-lactone; DGA, D-galacturonic acid; 2HBA, 2-Hydroxy-benzoic acid; 4HBA, 4-Hydroxy-benzoic acid; HbutA, Hydroxybutiric acid; Itaconic acid, Itaconic acid; ketobutyric acid, ketobutyric acid; malic acid, malic acid; arginine, arginine; asparag, asparagine; phenylala, phenylalanine; serine, serine; threonine, threonine; glutamic acid, glutamic acid; phenylethyl, phenylethylamine; putrescine, putrescine;

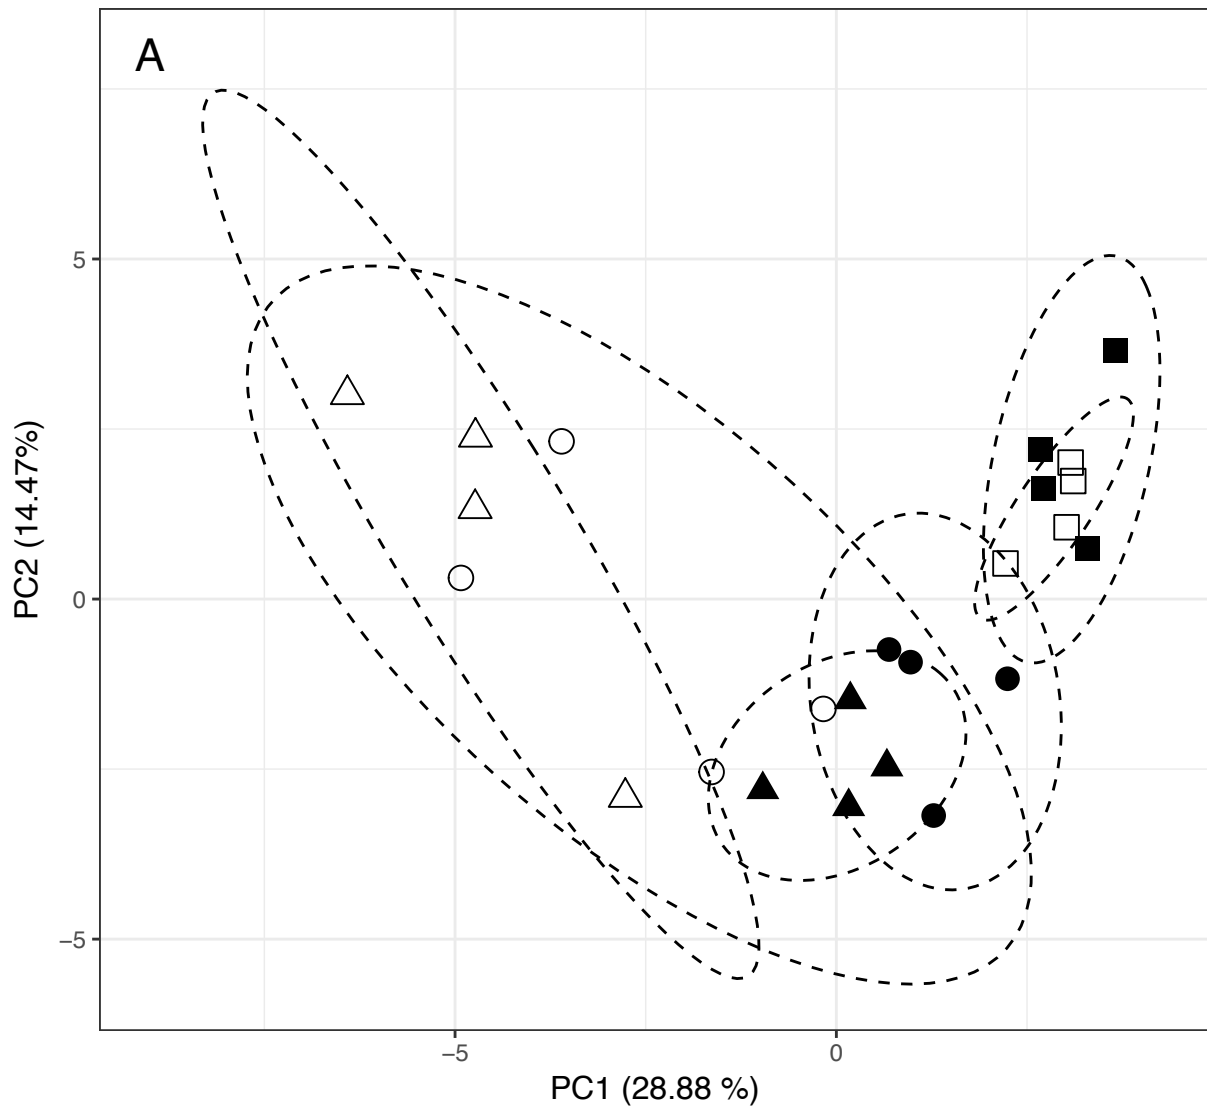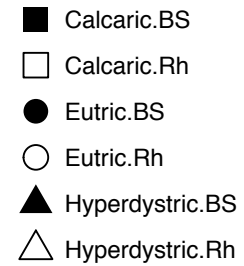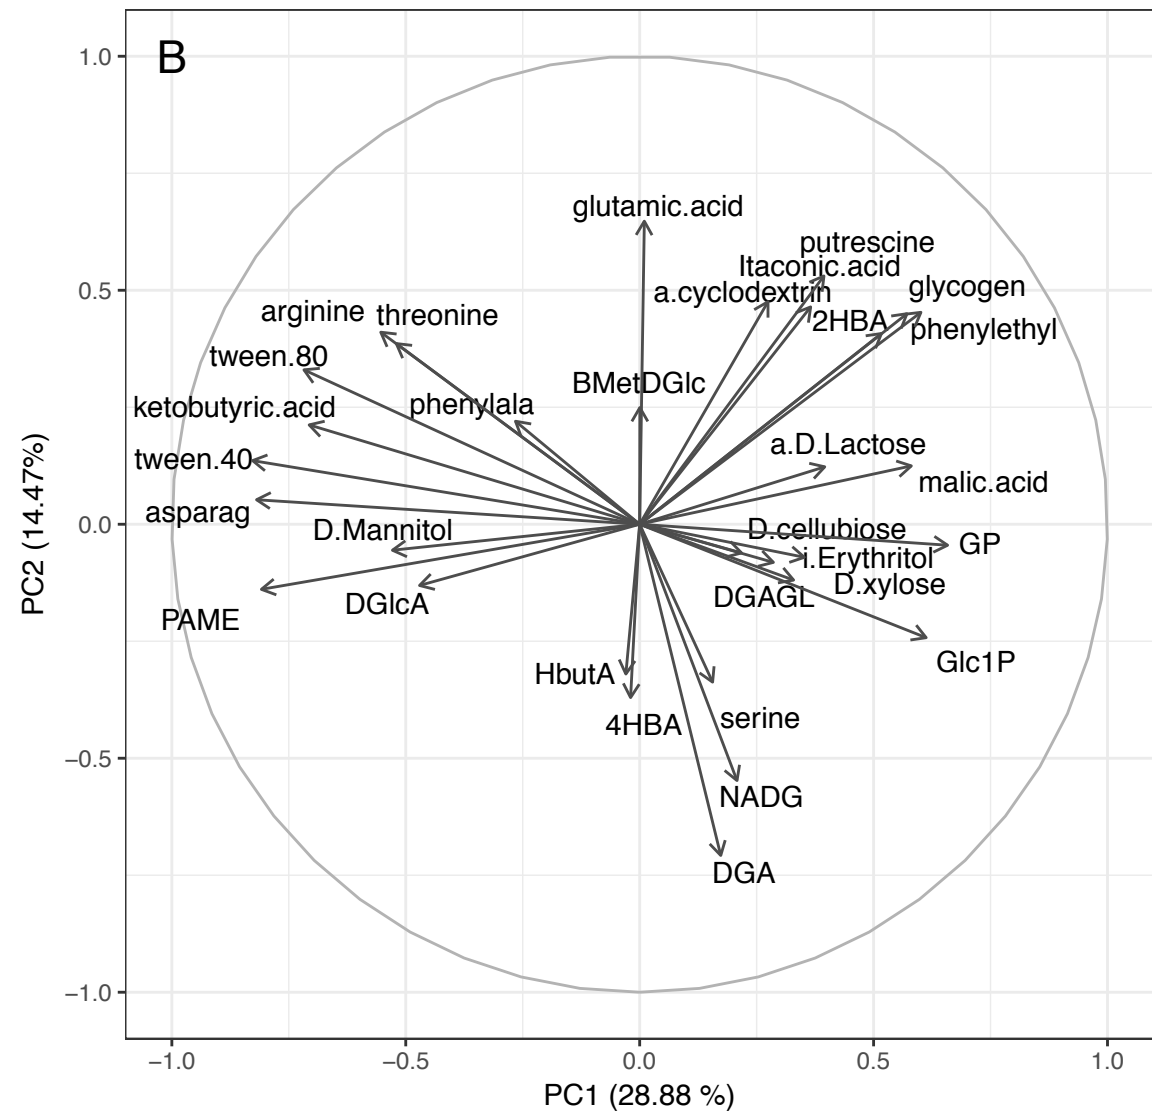

**Figure.S2 Rarefaction curves indicating the number of operational taxonomic units (OTUs) at a genetic distance of 3% in Cambisol Calcaric (A), Eutric (B) and Hyperdystric (C) soils. The full and dotted lines refer to the rhizosphere and bulk soil samples, respectively. Samples are referred as follow: Calcaric.BS: Cambisol Calcaric bulk soil; Calcaric.Rh: Cambisol Calcaric rhizosphere; Eutric.BS: Cambisol Eutric bulk soil; Eutric.Rh: Cambisol Eutric rhizosphere; Hyperdystric.BS: Cambisol Hyperdystric bulk soil; Hyperdystric.Rh: Cambisol Hyperdystric rhizosphere.**

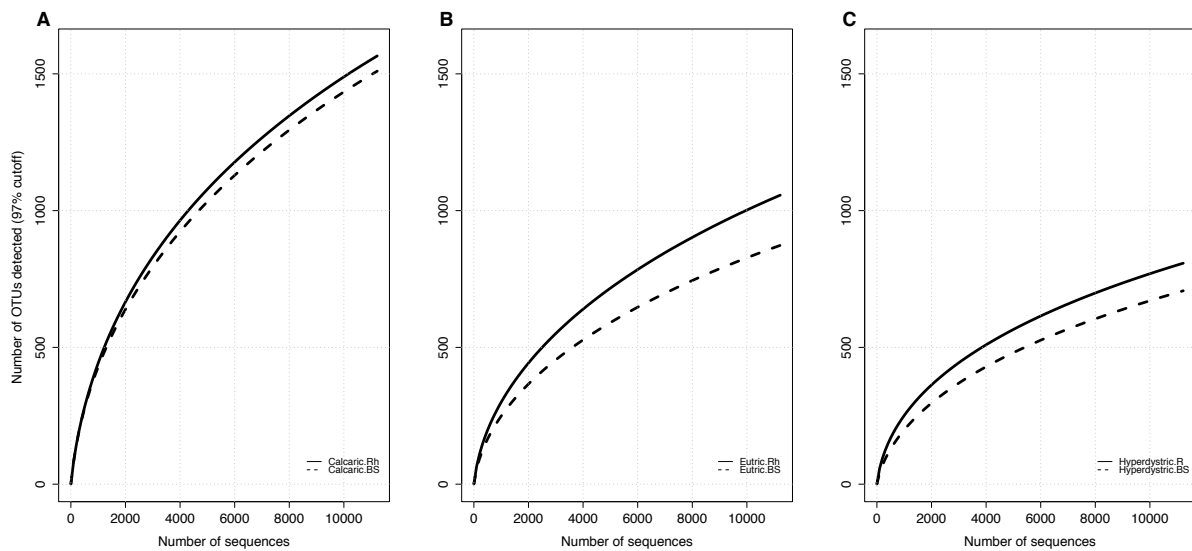

**Figure S3. Shift in taxonomic diversity of bulk soil and rhizosphere-associated bacterial communities across the soil toposequence of Montiers and between bulk soil and rhizosphere compartments in each soil type.** Multivariate analyses were performed at the OTU level and were conducted separately on bulk soil (BS, **Panel A**) and rhizosphere (Rh, **Panel B**) samples or on each soil types (**Calcaric samples, C; Eutric samples, D; Hyperdystric samples, E**) to determine a potential rhizosphere effect. The origins of samples are indicated as follows: filled orange squares, bulk soil samples from Calcaric; open orange squares, rhizosphere samples from Calcaric; filled green circles, bulk soil samples from Eutric, open green circles, rhizosphere samples from Eutric; filled blue triangles, bulk soil samples from Hyperdystric; open blue triangles, rhizosphere samples from Hyperdystric. Ellipses correspond to 95% confidence intervals about the mean.

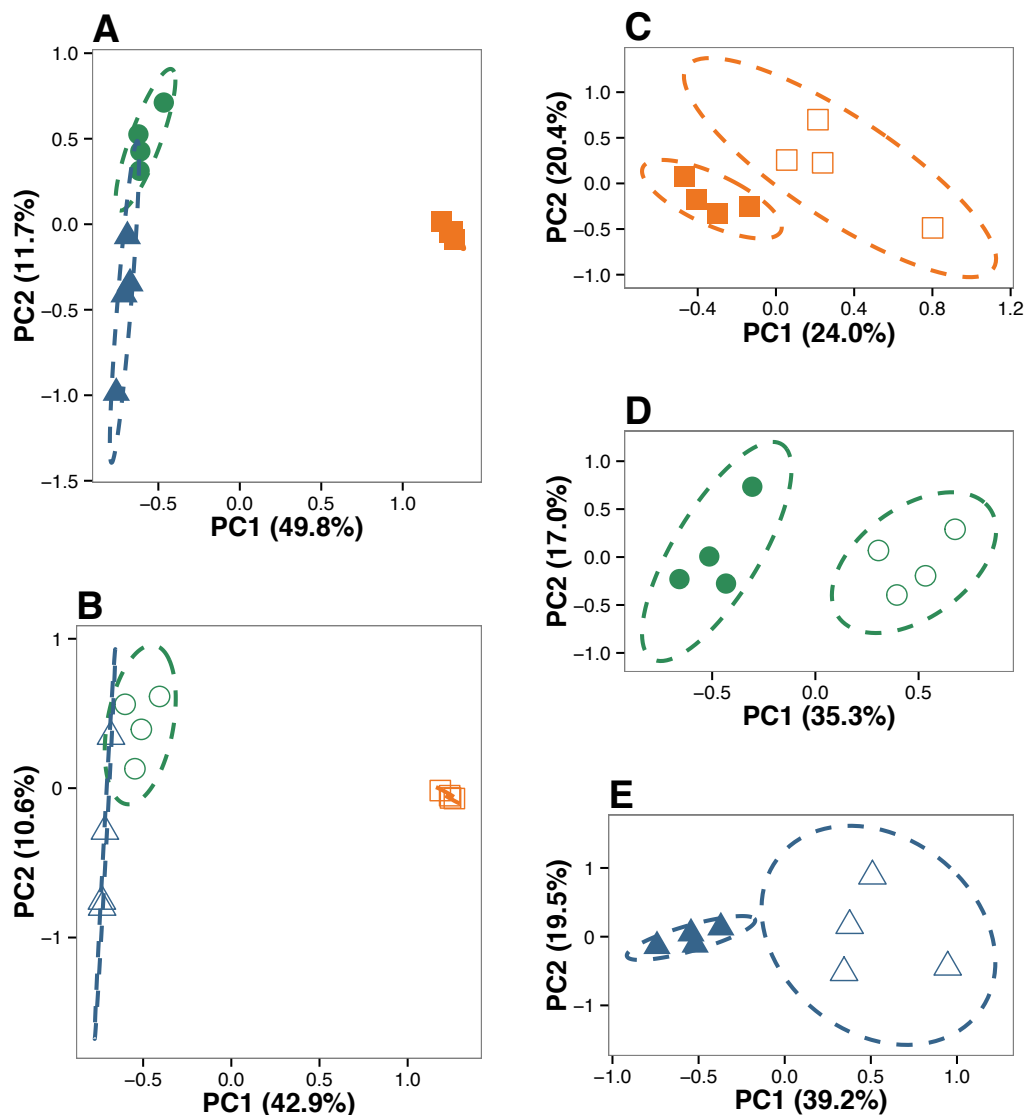

**Figure.S4 Estimation of the number of functional genes shared: (A) among the bulk soil (BS) samples or the rhizosphere (Rh) samples across the toposequence and (B) between bulk soil and rhizosphere samples for each soil type.**

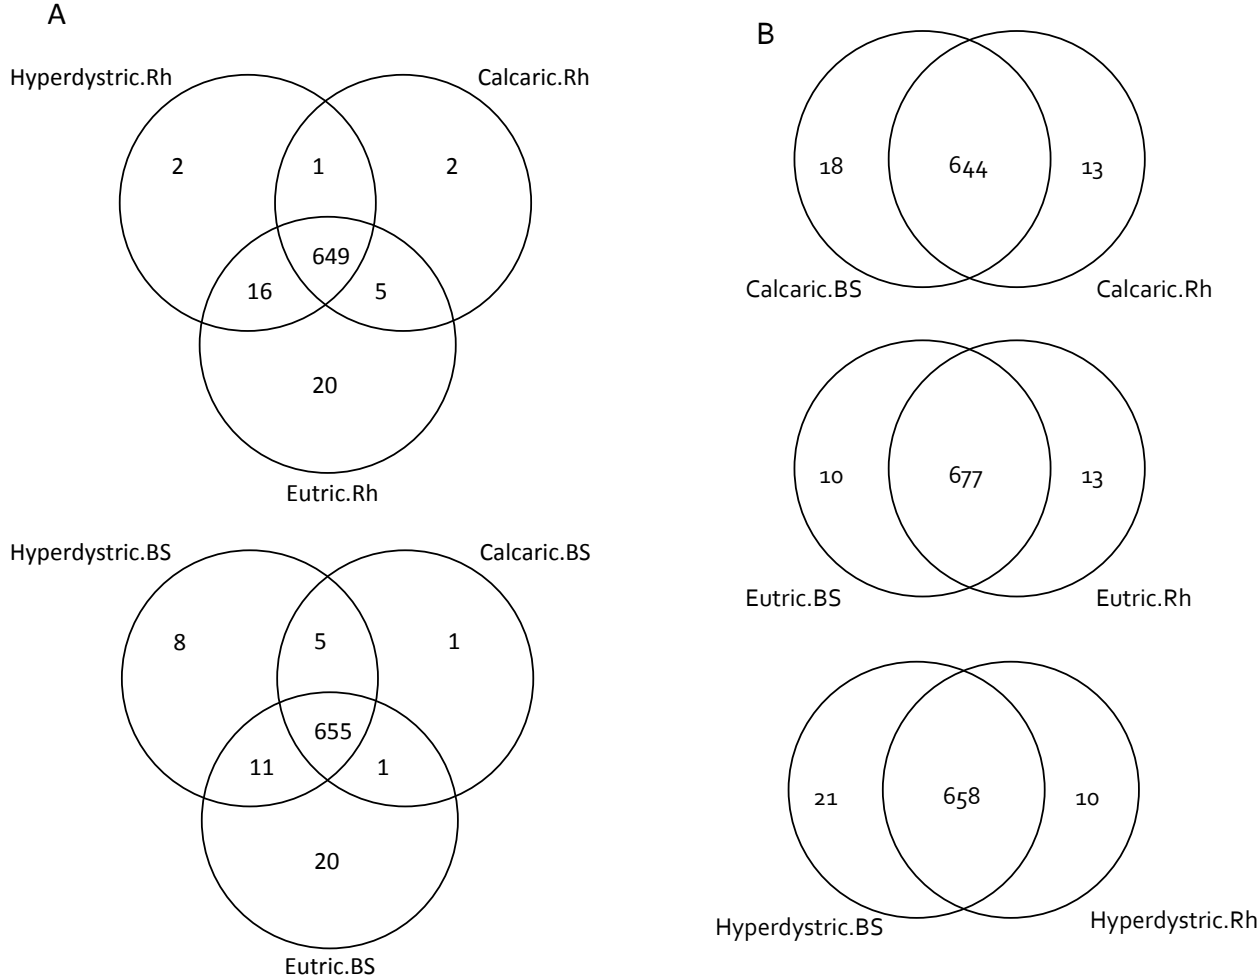



**Figure.S5: Normalized signal intensity of probes detected from different gene categories.** The signal intensities are the mean of detected individual probes averaged among the 3 biological replicates in the Cambisol Calcaric (A), Eutric (B) and Hyperdystric (C). All data are presented as mean ( $\pm$  Standard Error of the Mean). The significant differences among the bulk soil samples and their respective rhizosphere ( $P < 0.05$ ) are indicated above the bars (\*).

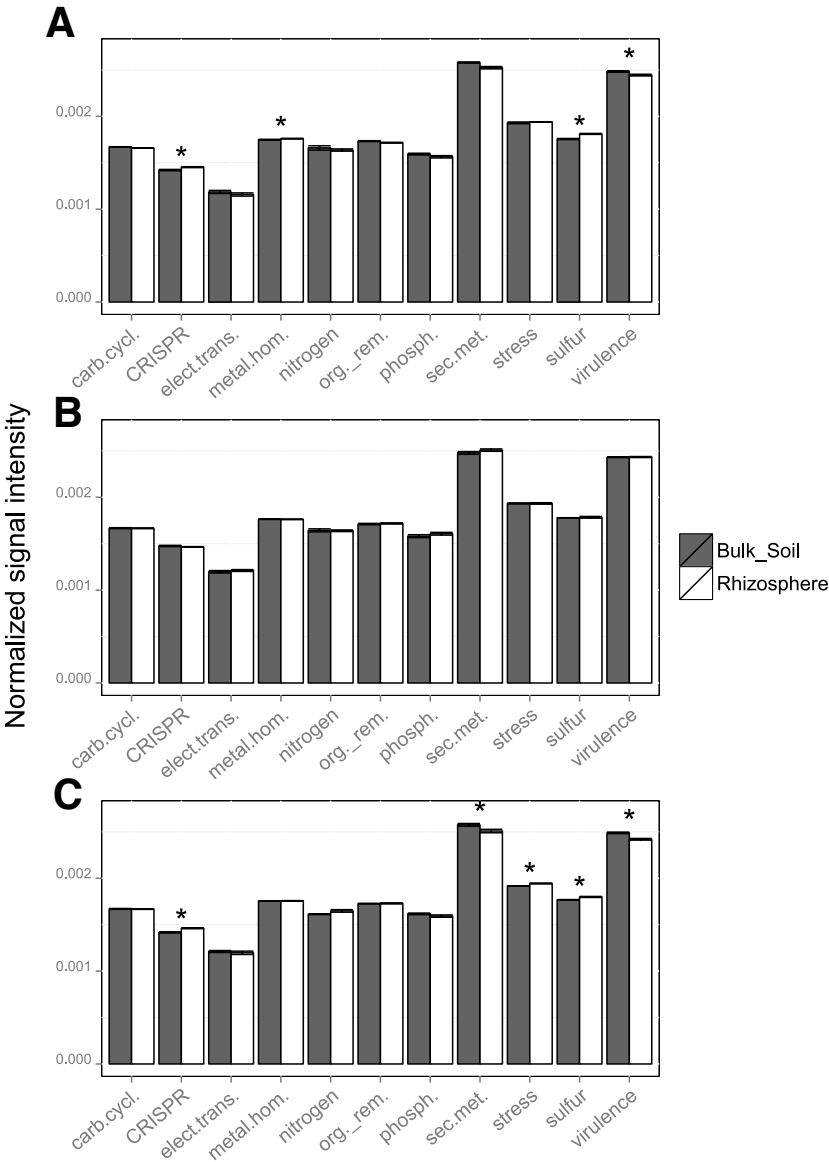

**Figure.S6 Normalized signal intensity of genes involved in metal transport.** The signal intensities are the mean of detected individual genes averaged among the 3 replicates from the Cambisol Calcaric (A), Eutric (B) and Hyperdystric (C). All data are presented as mean ( $\pm$  Standard Error of the Mean). The significant differences among the bulk soil (BS, grey) samples and their respective rhizosphere (R, white) are indicated by an asterisk above the bars ( $p < 0.05$ ).

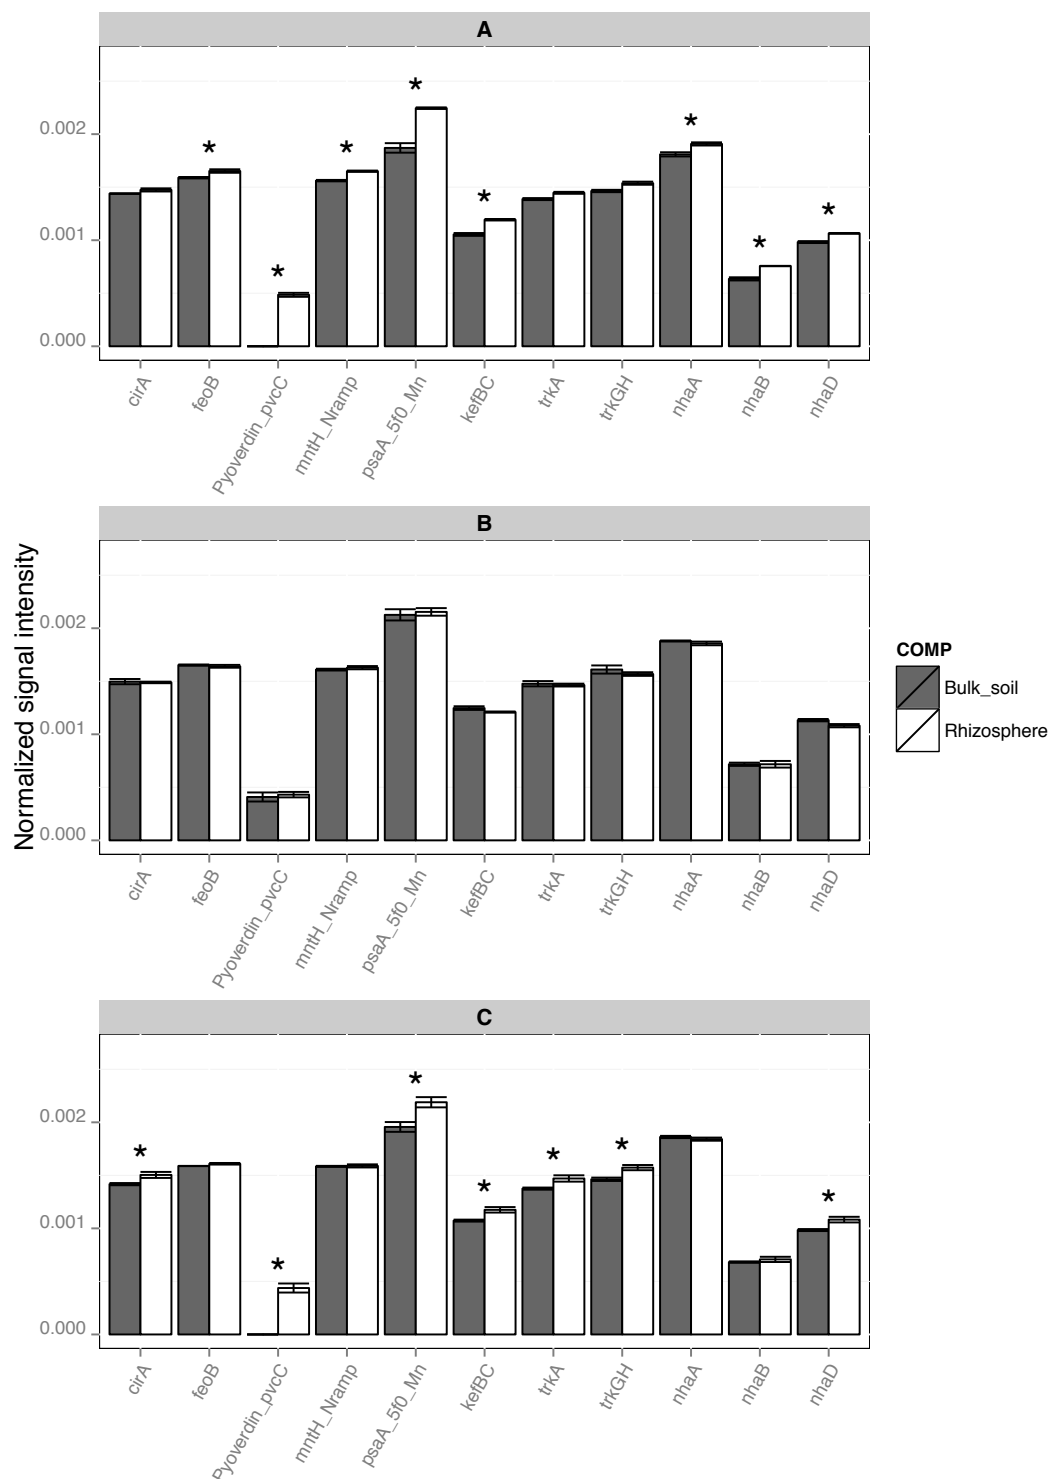

**Figure.S7. Heatmap analysis of genes involved in nutrient cycling.** The signal intensities are the mean of detected individual probes averaged among the 3 replicates for each compartment and soil type considered. Blue indicates signal intensities above background, whereas white indicates signal intensities below background. For each heatmap, the probe code (geochip code) and the taxonomic assignation are presented and the data are organized from the probes giving the higher signal at the top to the probes giving the lower signal at the bottom. For each function, only the top 10 is presented.

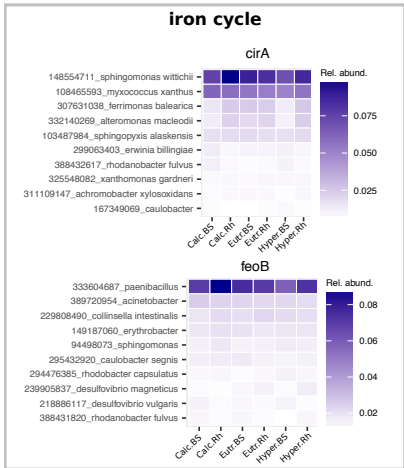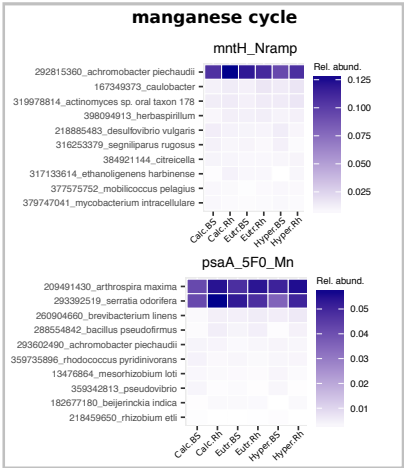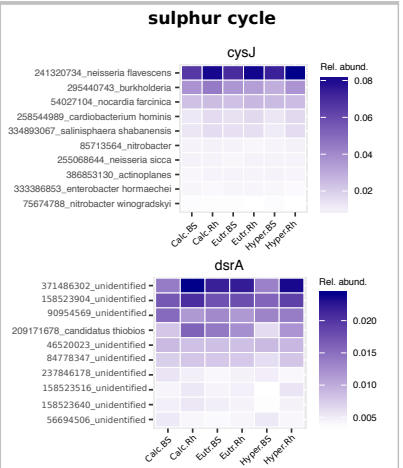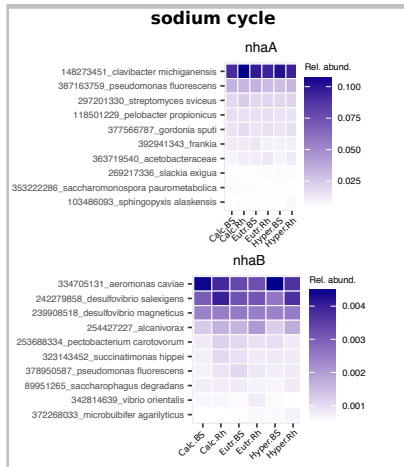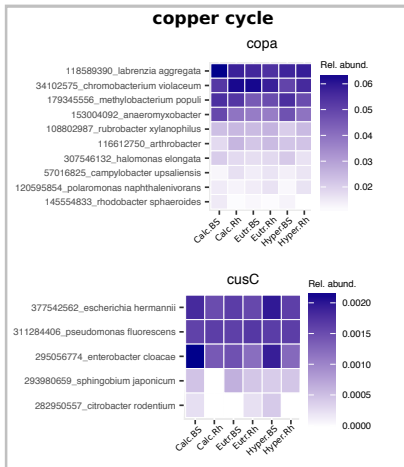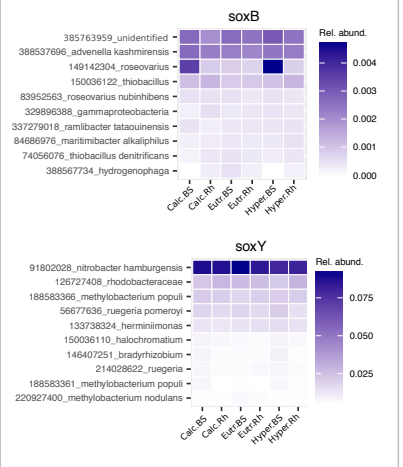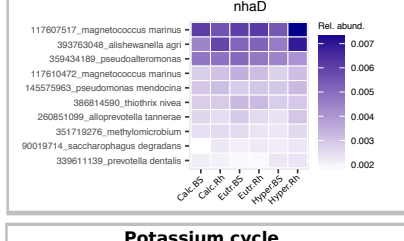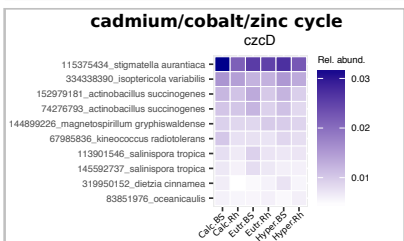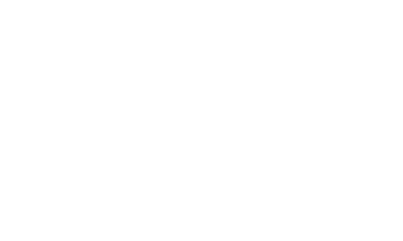

**Figure.S8 Normalized signal intensity of genes involved in the CRISPR system.** The signal intensities are the mean of detected individual genes averaged among the 3 replicates from the Cambisol Calcaric (A), Eutric (B) and Hyperdystric (C). All data are presented as mean ( $\pm$  Standard Error of the Mean). The significant differences among the bulk soil (BS, grey) samples and their respective rhizosphere (R, white) are indicated by an asterisk above the bars ( $p < 0.05$ ).

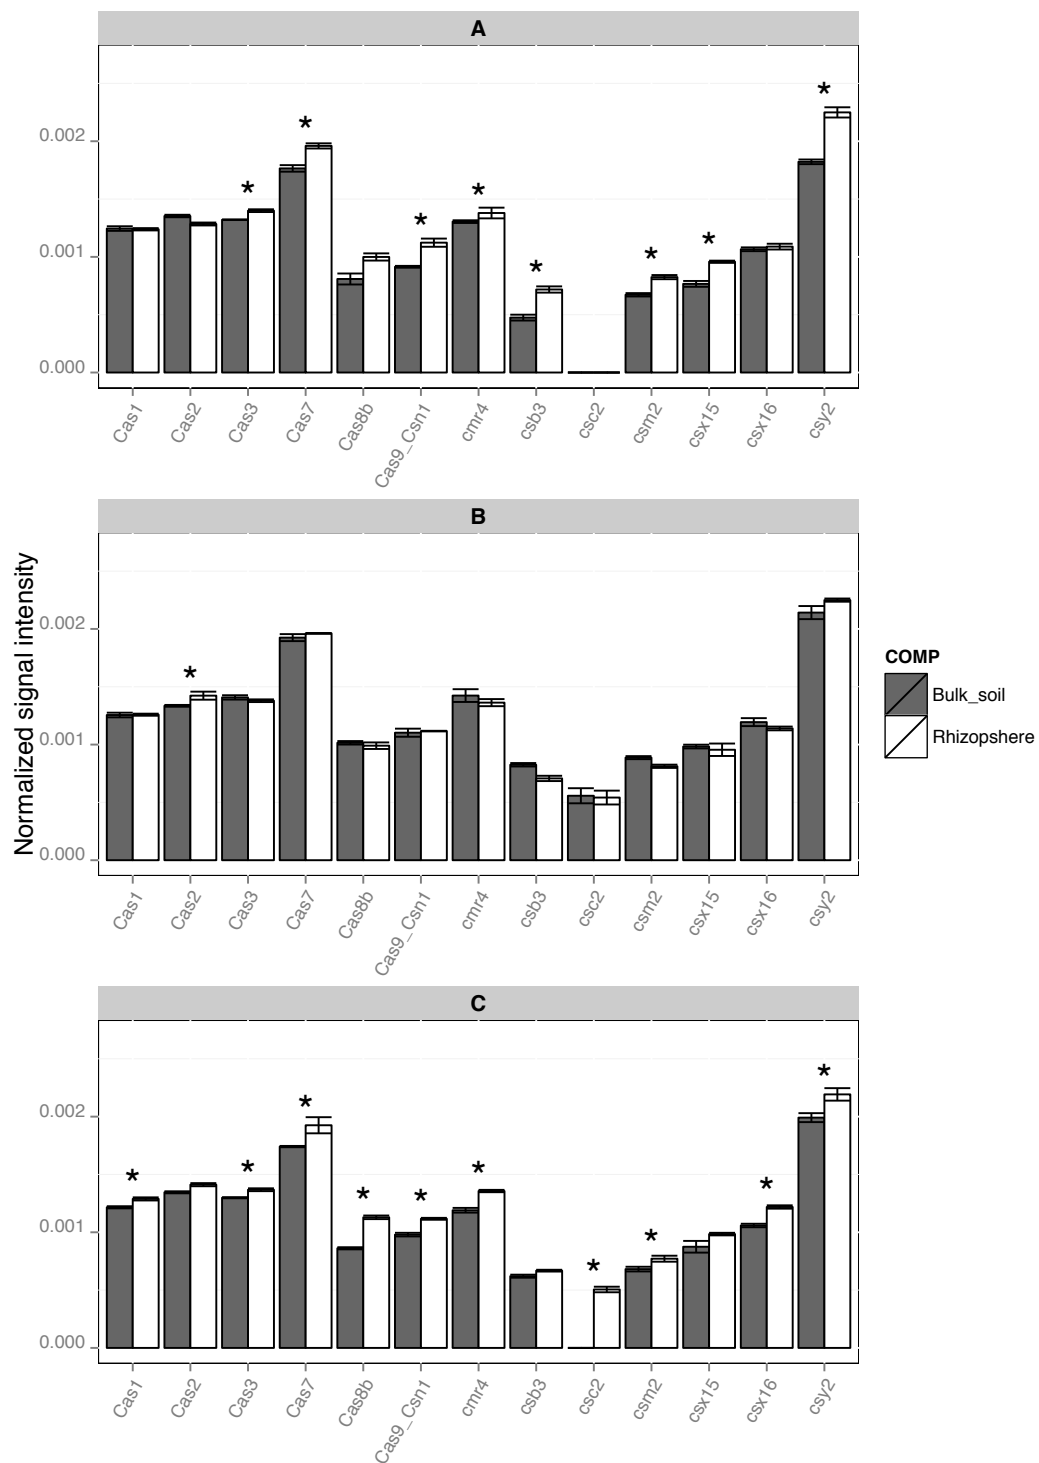

**Figure.S9. Heatmap analysis of genes involved in microbial interactions.** The signal intensities are the mean of detected individual probes averaged among the 3 replicates for each compartment and soil type considered. Blue indicates signal intensities above background, whereas white indicates signal intensities below background. For each heatmap, the probe code (geochip code) and the taxonomic assignation are presented and the data are organized from the probes giving the higher signal at the top to the probes giving the lower signal at the bottom. For each function, only the top 10 is presented.

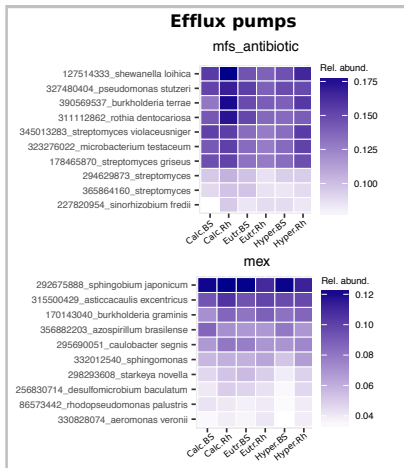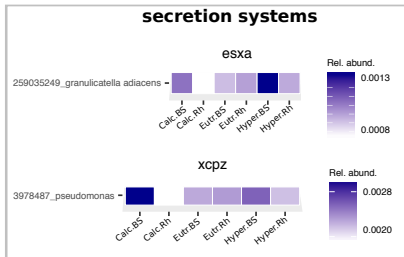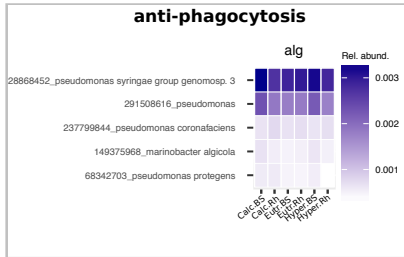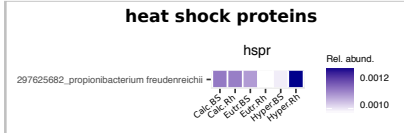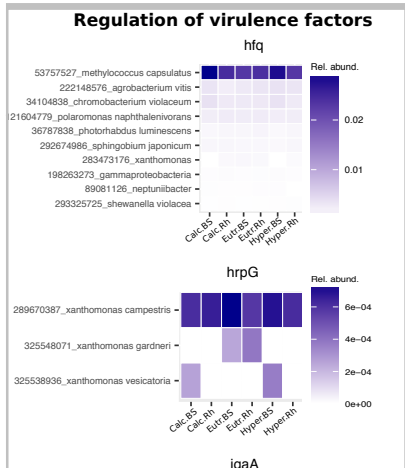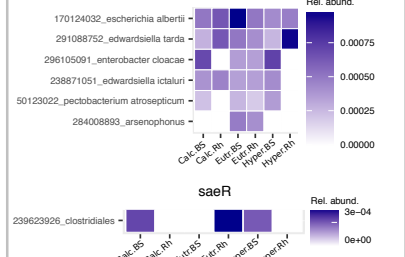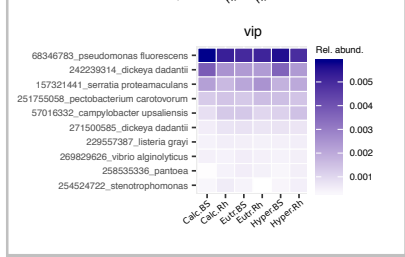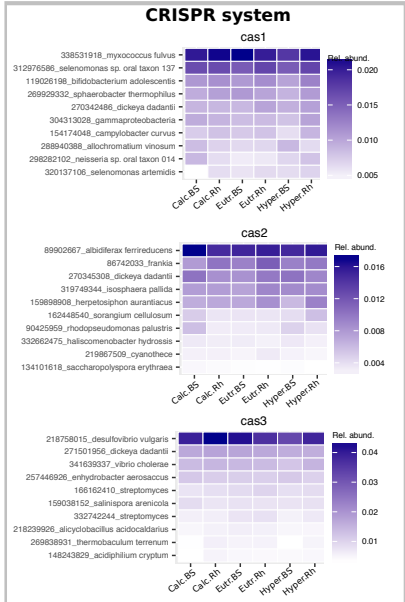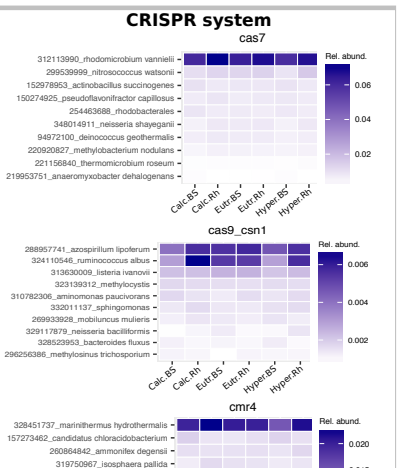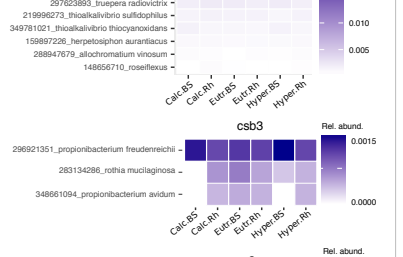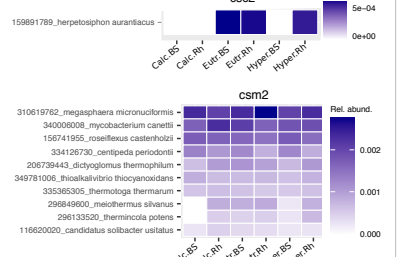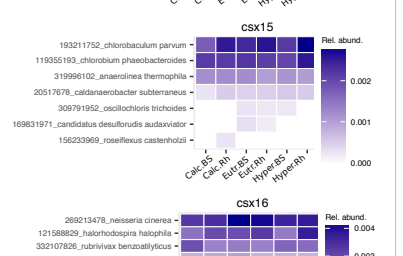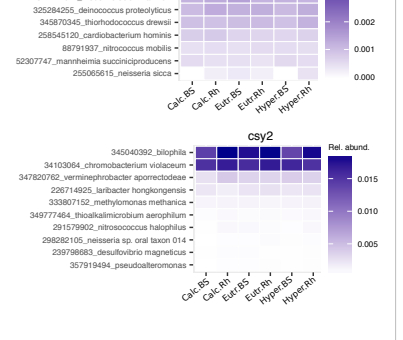

**Figure.S10 Normalized signal intensity of genes involved in carbon degradation.** The signal intensities are the mean of detected individual genes averaged among the 3 replicates from the Calcaric (A), Eutric (B) and Hyperdystric (C). All data are presented as mean ( $\pm$  Standard Error of the Mean). The significant differences among the bulk soil (BS, grey) samples and their respective rhizosphere (R, white) are indicated by an asterisk above the bars ( $p < 0.05$ ).

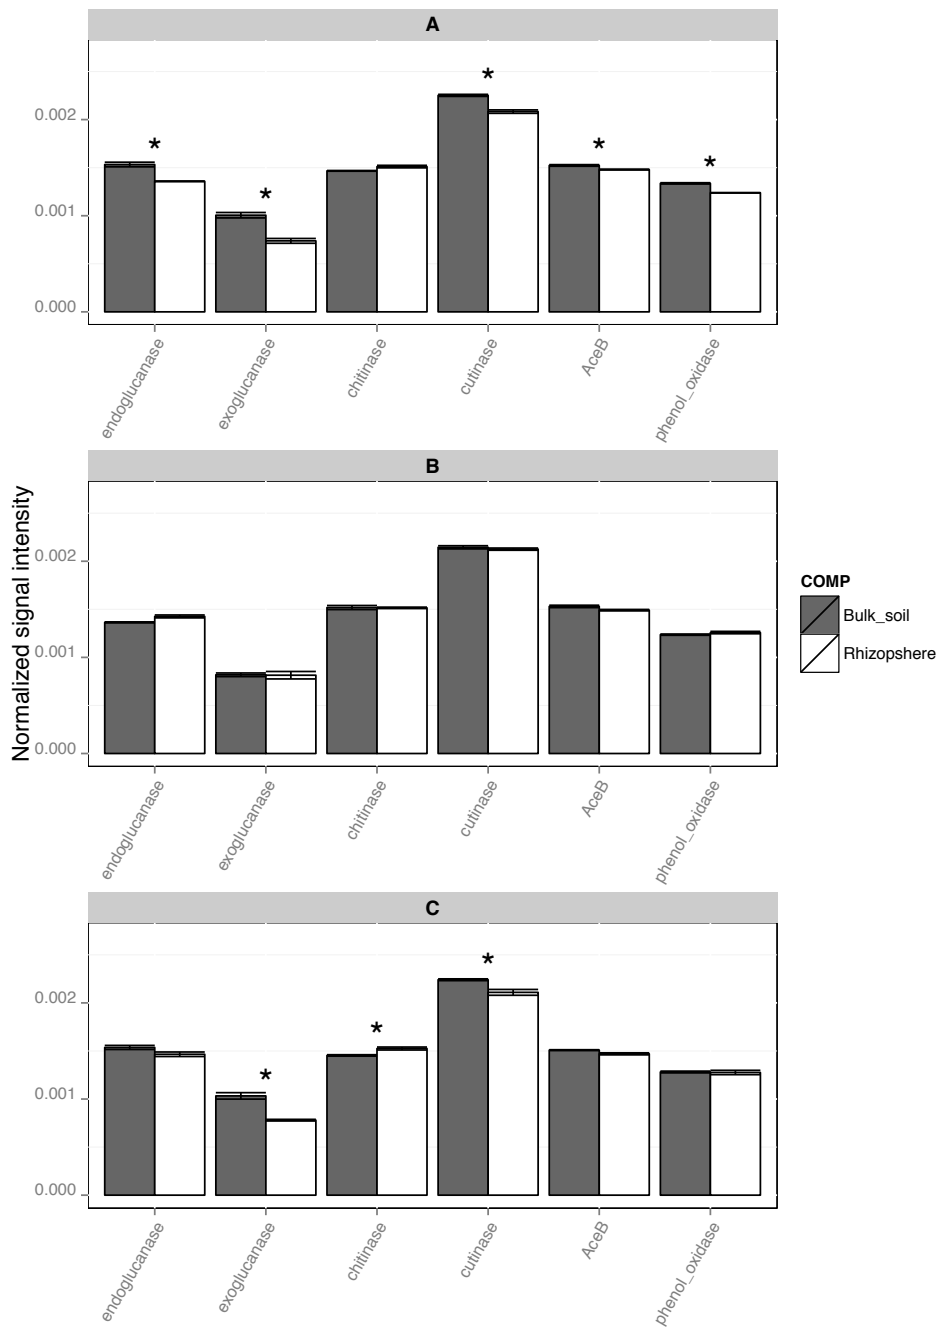



**Figure.S11. Heatmap analysis of genes involved in carbon cycling.** The signal intensities are the mean of detected individual probes averaged among the 3 replicates for each compartment and soil type considered. Blue indicates signal intensities above background, whereas white indicates signal intensities below background. For each heatmap, the probe code (geochip code) and the taxonomic assignment are presented and the data are organized from the probes giving the higher signal at the top to the probes giving the lower signal at the bottom. For each function, only the top 10 is presented.

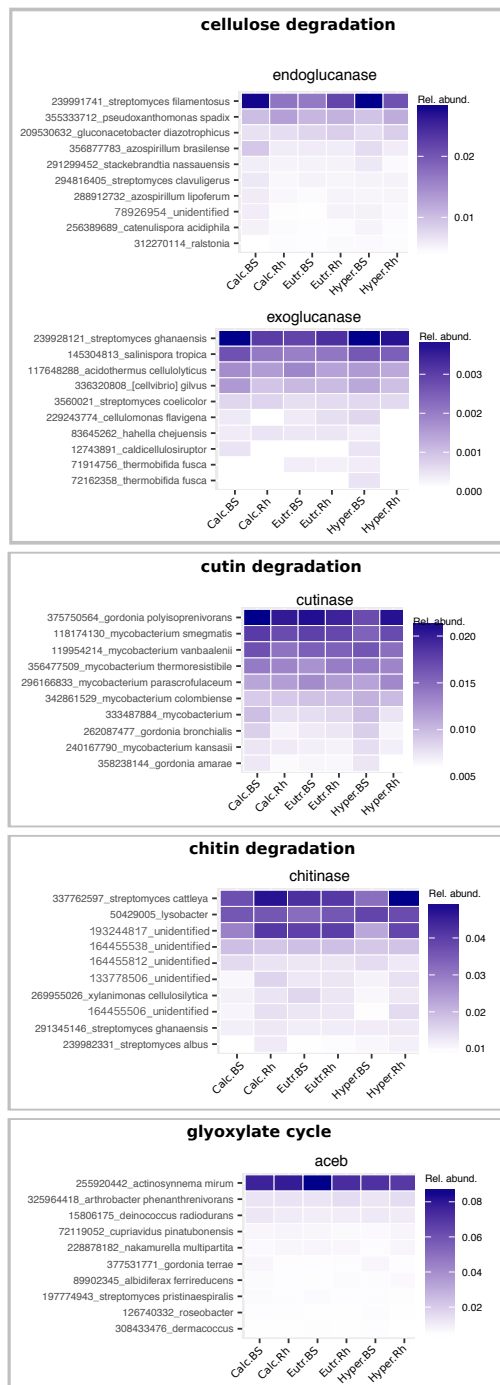

**Figure S12:** Partitioning of the variance in soil bacterial communities by explanatory variables (soil type and compartment). Barplots represent the variance explained by the soil variables effect, the compartment effect as well as the unexplained variance for each data measured (16S rRNA pyrosequences, GeoChip functional categories and Biolog data).

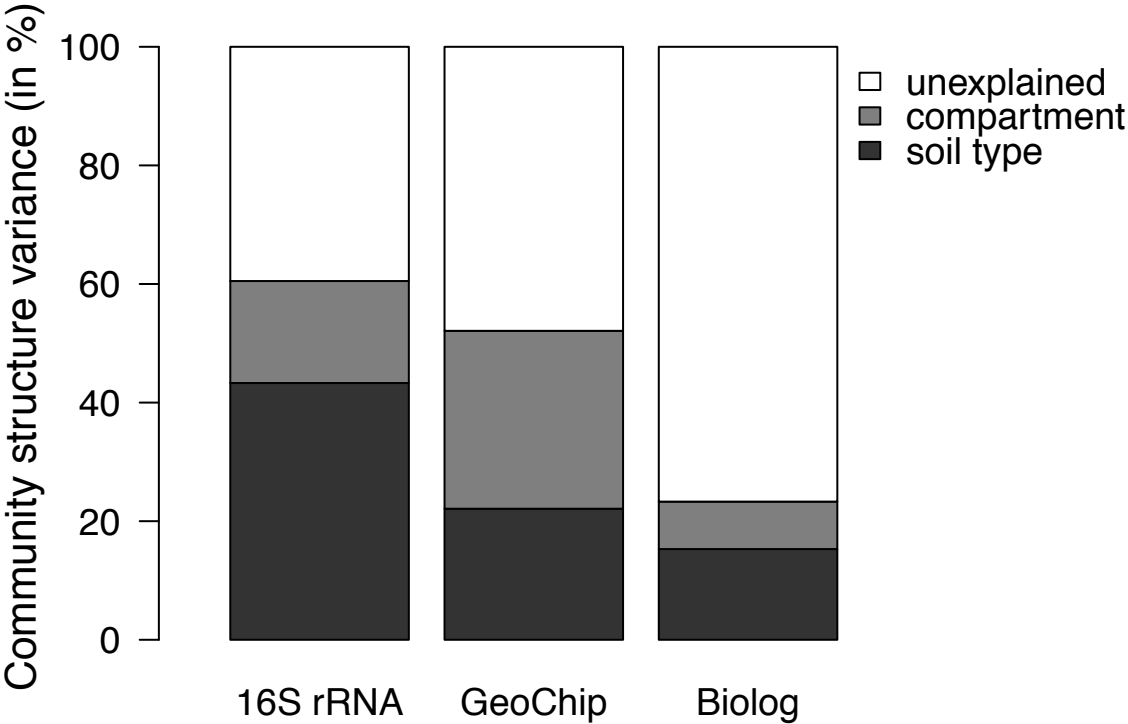

**Table S1: Physico-chemical characteristics of the soil samples collected along the toposequence of Montiers.** Soil analyses have been done at the Soil analysis platform of Arras (INRA, France) according to the protocols described in the material and methods section. Values are averages of 4 replicates (n=4). Several parameters measured have been abbreviated in the table as follows: Water cont., Water content; N, Total, total nitrogen; C tot, Total carbon; CEC, Cationic exchange capacity; P. Duch, Phosphorus extracted according to the Duchaufour method; P. Ols, Phosphorus extracted according to the Olsen method; OM, Organic matter; Limest., Limestone; H+, Exchangeable protons. For each soil parameter, significant differences are presented by different letters (a,b,c; P<0.05)

| Soil type           | pH                        | Water cont.               | N tot                    | C tot                     | C/N                       | P.Duch                   | P.Ols                    | OM                          | Limest.                  |
|---------------------|---------------------------|---------------------------|--------------------------|---------------------------|---------------------------|--------------------------|--------------------------|-----------------------------|--------------------------|
|                     |                           | (in %)                    | (g/kg)                   |                           |                           | (g/kg)                   |                          |                             |                          |
| <b>Calcaric</b>     | 7.14 <sup>a</sup> ± 0.03  | 39.65 <sup>a</sup> ± 1.55 | 4.89 <sup>a</sup> ± 0.40 | 66.88 <sup>a</sup> ± 6.25 | 13.65 <sup>a</sup> ± 0.19 | 0.34 <sup>a</sup> ± 0.03 | 0.04 <sup>a</sup> ± 0.00 | 115.63 <sup>a</sup> ± 10.81 | 7.25± 1.03               |
| <b>Eutric</b>       | 5.01 <sup>b</sup> ± 0.04  | 16.83 <sup>b</sup> ± 0.77 | 1.46 <sup>b</sup> ± 0.09 | 21.15 <sup>b</sup> ± 0.54 | 14.63 <sup>a</sup> ± 0.52 | 0.22 <sup>a</sup> ± 0.02 | 0.01 <sup>a</sup> ± 0.00 | 36.55 <sup>b</sup> ± 0.93   | <1                       |
| <b>Hyperdystric</b> | 4.63 <sup>c</sup> ± 0.04  | 11.50 <sup>c</sup> ± 0.33 | 1.19 <sup>b</sup> ± 0.07 | 17.20 <sup>b</sup> ± 0.74 | 14.53 <sup>a</sup> ± 0.53 | 0.38 <sup>a</sup> ± 0.13 | 0.03 <sup>a</sup> ± 0.02 | 29.78 <sup>b</sup> ± 1.30   | <1                       |
| Soil type           | CEC                       | H+                        | Mg                       | Ca                        | K                         | Na                       | Mn                       | Al                          | Fe                       |
|                     | cmol+/kg                  |                           |                          |                           |                           |                          |                          |                             |                          |
| <b>Calcaric</b>     | 48.30 <sup>a</sup> ± 2.04 | <0.05                     | 0.81 <sup>a</sup> ± 0.14 | 48.80 <sup>a</sup> ± 2.03 | 0.29 <sup>a</sup> ± 0.01  | 0.07 <sup>a</sup> ± 0.00 | 0.02 <sup>c</sup> ± 0.00 | 0.11 <sup>c</sup> ± 0.01    | 0.02 <sup>a</sup> ± 0.00 |
| <b>Eutric</b>       | 6.45 <sup>b</sup> ± 0.59  | 0.32 <sup>a</sup> ± 0.01  | 0.25 <sup>b</sup> ± 0.04 | 2.51 <sup>b</sup> ± 0.61  | 0.10 <sup>b</sup> ± 0.01  | 0.04 <sup>b</sup> ± 0.00 | 0.12 <sup>b</sup> ± 0.03 | 3.06 <sup>a</sup> ± 0.22    | 0.03 <sup>a</sup> ± 0.00 |
| <b>Hyperdystric</b> | 2.66 <sup>b</sup> ± 0.16  | 0.33 <sup>a</sup> ± 0.01  | 0.08 <sup>b</sup> ± 0.01 | 0.26 <sup>b</sup> ± 0.05  | 0.07 <sup>b</sup> ± 0.01  | 0.01 <sup>c</sup> ± 0.00 | 0.23 <sup>a</sup> ± 0.03 | 2.17 <sup>b</sup> ± 0.10    | 0.02 <sup>a</sup> ± 0.00 |

**Table S2: Estimates of the taxonomic (16S rRNA gene libraries), functional (GeoChip microarray and Biolog) bacterial diversity for bulk soil and rhizosphere samples along the toposequence of Montiers.** Each value is the mean of biological replicates ( $\pm$  Standard Error of the Mean). For each indicator, significant differences are presented by different letters ( $P < 0.05$ ).

| Samples      | Compartment | 16S rRNA gene libraries    |                               |                              |                  | GeoChip microarray          |                               | Biolog Ecoplate                |                               |
|--------------|-------------|----------------------------|-------------------------------|------------------------------|------------------|-----------------------------|-------------------------------|--------------------------------|-------------------------------|
|              |             | No. of OTUs (0.03%)        | Shannon index                 | Chao1 index                  | Coverage         | No. of genes                | Shannon index                 | No. of substrates metabolized  | Shannon index                 |
| Calcaric     | Bulk Soil   | 1510 <sup>a</sup> $\pm$ 10 | 6.12 <sup>a</sup> $\pm$ 0.02  | 2444 <sup>a</sup> $\pm$ 19   | 0.94 $\pm$ 0.001 | 655 <sup>b</sup> $\pm$ 7.3  | 6.48 <sup>b</sup> $\pm$ 0.01  | 28.50 <sup>a</sup> $\pm$ 2.38  | 3.17 <sup>a</sup> $\pm$ 0.13  |
| Calcaric     | Rhizosphere | 1566 <sup>a</sup> $\pm$ 44 | 6.16 <sup>a</sup> $\pm$ 0.07  | 2478 <sup>a</sup> $\pm$ 57   | 0.94 $\pm$ 0.001 | 654 <sup>b</sup> $\pm$ 0.3  | 6.48 <sup>b</sup> $\pm$ 0.00  | 28.50 <sup>a</sup> $\pm$ 1.29  | 3.18 <sup>a</sup> $\pm$ 0.03  |
| Eutric       | Bulk Soil   | 881 <sup>b</sup> $\pm$ 65  | 4.44 <sup>cd</sup> $\pm$ 0.24 | 1523 <sup>bc</sup> $\pm$ 121 | 0.96 $\pm$ 0.003 | 681 <sup>a</sup> $\pm$ 1.0  | 6.52 <sup>a</sup> $\pm$ 0.00  | 29.25 <sup>a</sup> $\pm$ 1.50  | 3.02 <sup>ab</sup> $\pm$ 0.09 |
| Eutric       | Rhizosphere | 1057 <sup>b</sup> $\pm$ 66 | 5.18 <sup>b</sup> $\pm$ 0.12  | 1767 <sup>b</sup> $\pm$ 69   | 0.96 $\pm$ 0.002 | 683 <sup>a</sup> $\pm$ 6.8  | 6.53 <sup>a</sup> $\pm$ 0.01  | 24.25 <sup>ab</sup> $\pm$ 4.57 | 2.73 <sup>c</sup> $\pm$ 0.21  |
| Hyperdystric | Bulk Soil   | 707 <sup>c</sup> $\pm$ 59  | 3.78 <sup>d</sup> $\pm$ 0.25  | 1197 <sup>c</sup> $\pm$ 113  | 0.97 $\pm$ 0.003 | 674 <sup>ab</sup> $\pm$ 3.5 | 6.51 <sup>ab</sup> $\pm$ 0.01 | 27.00 <sup>ab</sup> $\pm$ 1.82 | 2.87 <sup>bc</sup> $\pm$ 0.06 |
| Hyperdystric | Rhizosphere | 807 <sup>c</sup> $\pm$ 23  | 4.76 <sup>bc</sup> $\pm$ 0.18 | 1299 <sup>c</sup> $\pm$ 72   | 0.97 $\pm$ 0.002 | 662 <sup>ab</sup> $\pm$ 2.2 | 6.50 <sup>ab</sup> $\pm$ 0.00 | 22.75 <sup>b</sup> $\pm$ 1.71  | 2.69 <sup>c</sup> $\pm$ 0.07  |

**Table.S3: Changes in taxonomic composition along the toposequence for bulk soil and rhizosphere samples.** Text in bold indicates significant differences. Samples are referred as follow: CC: Calcaric Cambisol; EC: Eutric Cambisol; HC: Hyperdystric Cambisol. The symbols '>' and '<' mean significantly more or less abundant and '=' not significantly different.

| BULK SOIL SAMPLES |                    |                    | RHIZOPHERE SAMPLES |                    |                    |                     |                     |
|-------------------|--------------------|--------------------|--------------------|--------------------|--------------------|---------------------|---------------------|
| PHYLUM            | CLASS              | ORDER              | PHYLUM             | CLASS              | ORDER              |                     |                     |
| Acidobacteria     | Acidobacteria_Gp1  | CC>EC=HC           | Acidobacteria      | Acidobacteria_Gp1  | HC=EC>CC           |                     |                     |
|                   | Acidobacteria_Gp2  | CC<EC>HC           |                    | Acidobacteria_Gp2  | HC=EC>CC           |                     |                     |
|                   | Acidobacteria_Gp3  | EC>CC              |                    | Acidobacteria_Gp3  | HC=EC>CC           |                     |                     |
|                   | Acidobacteria_Gp4  |                    |                    | Acidobacteria_Gp4  | Acidobacteria_Gp4  |                     |                     |
|                   | Acidobacteria_Gp5  | CC>EC=HC           |                    | Acidobacteria_Gp5  | CC=EC=HC           |                     |                     |
|                   | Acidobacteria_Gp6  |                    |                    | Acidobacteria_Gp6  | CC>EC=HC           |                     |                     |
|                   | Acidobacteria_Gp7  |                    |                    | Acidobacteria_Gp7  | CC>EC=HC           |                     |                     |
|                   | Acidobacteria_Gp11 | CC>EC=HC           |                    | Acidobacteria_Gp11 | CC>EC=HC           |                     |                     |
|                   | Acidobacteria_Gp22 | CC>EC=HC           |                    | Acidobacteria_Gp22 | CC>EC=HC           |                     |                     |
|                   | Acidobacteria_Gp25 | CC>EC=HC           |                    | Acidobacteria_Gp25 | ND                 |                     |                     |
| Holophagae        |                    | Holophagales       | Holophagae         |                    |                    |                     |                     |
| Unclassified      | CC>EC=HC           | Unclassified       | Unclassified       | CC>EC              |                    |                     |                     |
| Actinobacteria    | Actinobacteria     | Actinobacteria     | Actinobacteria     | Actinobacteria     | Actinobacteria     |                     |                     |
|                   |                    | Actinobacteria     |                    |                    | Actinobacteria     |                     |                     |
|                   |                    | Actinobacteria     |                    |                    | Actinobacteria     |                     |                     |
| Bacteroidetes     | Flavobacteria      | Flavobacteriales   | Bacteroidetes      | Flavobacteria      | Flavobacteriales   |                     |                     |
|                   | Sphingobacteria    | Sphingobacteriales |                    | Sphingobacteria    | Sphingobacteriales |                     |                     |
| Chlamydiae        | Chlamydiae         | Chlamydiales       | Chlamydiae         | Chlamydiae         | Chlamydiales       |                     |                     |
| Chloroflexi       | Chloroflexi        | Chloroflexi        | Chloroflexi        | Chloroflexi        | Chloroflexi        |                     |                     |
|                   | Unclassified       | Unclassified       |                    | Unclassified       | Unclassified       |                     |                     |
| Deinococcus       | Deinococcus        | Deinococcus        | Deinococcus        | Deinococcus        | Deinococcales      |                     |                     |
| Firmicutes        | Bacilli            | Bacilli            | Bacilli            | Bacilli            | Bacilli            |                     |                     |
|                   |                    | Lactobacillales    |                    |                    | Lactobacillales    |                     |                     |
|                   |                    | unclassified       |                    |                    | unclassified       |                     |                     |
| Gemmatimodetes    | Gemmatimodetes     | Gemmatimodetes     | Gemmatimodetes     | Gemmatimodetes     | Gemmatimodetes     |                     |                     |
|                   | Nitrospira         | Nitrospirales      |                    | Nitrospira         | Nitrospirales      |                     |                     |
| OP10              | OP10               | OP10               | OP10               | OP11               | OP11               |                     |                     |
| Planctomycetes    | Planctomycetes     | Planctomycetales   | Planctomycetes     | Planctomycetes     | Planctomycetales   |                     |                     |
|                   |                    |                    |                    |                    |                    | Alphaproteobacteria | Alphaproteobacteria |
|                   |                    |                    |                    |                    |                    | Betaproteobacteria  | Betaproteobacteria  |
|                   |                    |                    |                    |                    |                    | Deltaproteobacteria | Deltaproteobacteria |
|                   |                    |                    |                    |                    |                    | Gammaproteobacteria | Gammaproteobacteria |
| Spirochaetes      | Spirochaetes       | Spirochaetales     | Spirochaetes       | Spirochaetes       | Spirochaetales     |                     |                     |
| TM7               | TM7                | TM7                | TM7                | TM7                | TM7                |                     |                     |
| Verrucomicrobia   | Opitutae           | Opitutales         | Verrucomicrobia    | Opitutae           | Opitutales         |                     |                     |
|                   | Spartobacteria     | Spartobacteria     |                    | Spartobacteria     | Spartobacteria     |                     |                     |
|                   | Subdivision3       | Subdivision3       |                    | Subdivision3       | Subdivision3       |                     |                     |
| WS3               | WS3                | unclassified       | WS3                | WS3                | unclassified       |                     |                     |

**Table.S4 Part 1: Changes in taxonomic composition between bulk soil and rhizosphere samples for each soil type.** Text in red and blue indicates a significant increase in rhizosphere and bulk soils samples, respectively. Samples are referred as follow: BS: Bulk Soil; Rh: Rhizosphere. The symbols '>' and '<' mean significantly more or less abundant and '=' not significantly different.

| CALCARIC CAMBISOL    |                      |                      |                       | EUTRIC CAMBISOL     |                    |                     |                       | HYPERDYSTRIC CAMBISOL |                    |                    |                       |           |
|----------------------|----------------------|----------------------|-----------------------|---------------------|--------------------|---------------------|-----------------------|-----------------------|--------------------|--------------------|-----------------------|-----------|
| PHYLUM               | CLASS                | ORDER                | FAMILY                | PHYLUM              | CLASS              | ORDER               | FAMILY                | PHYLUM                | CLASS              | ORDER              | FAMILY                |           |
| Acidobacteria        | Gp1                  | Gp1                  | Gp1                   | Acidobacteria       | Gp1                | Gp1                 | Gp1                   | Acidobacteria         | Gp1                | Gp1                | Gp1                   |           |
|                      | Gp11 BS>Rh           | Gp11 BS>Rh           | Gp11 BS>Rh            |                     | Gp11 ND            | Gp11 ND             | Gp11 ND               |                       | Gp11 ND            | Gp11               | Gp11                  | Gp11      |
|                      | Gp2                  | Gp2                  | Gp2                   |                     | Gp2 BS>Rh          | Gp2 BS>Rh           | Gp2                   |                       | Gp2 BS>Rh          | Gp2                | Gp2                   | Gp2       |
|                      | Gp22 BS>Rh           | Gp22 BS>Rh           | Gp22 BS>Rh            |                     | Gp22               | Gp22                | Gp22 ND               |                       | Gp22               | Gp22 ND            | Gp22                  | Gp22 ND   |
|                      | Gp25 BS>Rh           | Gp25 BS>Rh           | Gp25 BS>Rh            |                     | Gp25 ND            | Gp25 ND             | Gp25 ND               |                       | Gp25               | Gp25 ND            | Gp25                  | Gp25 ND   |
|                      | Gp3                  | Gp3                  | Gp3                   |                     | Gp3                | Gp3                 | Gp3                   |                       | Gp3                | Gp3                | Gp3                   | Gp3       |
|                      | Gp4                  | Gp4                  | Gp4                   |                     | Gp4                | Gp4                 | Gp4                   |                       | Gp4                | Gp4 ND             | Gp4                   | Gp4 ND    |
|                      | Gp5 BS>Rh            | Gp5 BS>Rh            | Gp5 BS>Rh             |                     | Gp5                | Gp5                 | Gp5                   |                       | Gp5                | Gp5 BS>Rh          | Gp5 BS>Rh             | Gp5 BS>Rh |
| Gp6                  | Gp6                  | Gp6                  | Gp6                   | Gp6                 | Gp6                | Gp6                 | Gp6                   | Gp6                   | Gp6                |                    |                       |           |
| Gp7                  | Gp7                  | Gp7                  | Gp7                   | Gp7                 | Gp7                | Gp7                 | Gp7                   | Gp7                   | Gp7                |                    |                       |           |
| Holophagae           | ND                   | Holophagales         | Holophagaceae         | Holophagae          | unclassified       | Holophagales        | Holophagaceae         | Holophagae            | unclassified       | Holophagales       | Holophagaceae         |           |
| unclassified         | unclassified         | unclassified         | unclassified          | unclassified        | unclassified       | unclassified        | unclassified          | unclassified          | unclassified       | unclassified       | unclassified          |           |
| Actinobacteria       | Actinobacteria       | Actinomycetales      | Acidimicrobiales      | Actinobacteria      | Actinobacteria     | Actinomycetales     | Acidimicrobiales      | Actinobacteria        | Actinobacteria     | Actinomycetales    | Acidimicrobiales      |           |
|                      |                      |                      | Acidimicrobiaceae     |                     |                    |                     | Acidimicrobiaceae     |                       |                    |                    | Acidimicrobiaceae     |           |
|                      |                      |                      | lamiaeae              |                     |                    |                     | lamiaeae              |                       |                    |                    | lamiaeae              |           |
|                      |                      |                      | unclassified          |                     |                    |                     | unclassified          |                       |                    |                    | unclassified          |           |
|                      |                      |                      | Acidothermaceae       |                     |                    |                     | Acidothermaceae       |                       |                    |                    | Acidothermaceae       |           |
|                      |                      |                      | Actinomycetaceae      |                     |                    |                     | Actinomycetaceae      |                       |                    |                    | Actinomycetaceae      |           |
|                      |                      |                      | Actinospiroaceae      |                     |                    |                     | Actinospiroaceae      |                       |                    |                    | Actinospiroaceae      |           |
|                      |                      |                      | Actinosynnemataceae   |                     |                    |                     | Actinosynnemataceae   |                       |                    |                    | Actinosynnemataceae   |           |
|                      |                      |                      | Catenulisporaceae     |                     |                    |                     | Catenulisporaceae     |                       |                    |                    | Catenulisporaceae     |           |
|                      |                      |                      | Cellulomonadaceae     |                     |                    |                     | Cellulomonadaceae     |                       |                    |                    | Cellulomonadaceae     |           |
|                      |                      |                      | Corynebacteriaceae    |                     |                    |                     | Corynebacteriaceae    |                       |                    |                    | Corynebacteriaceae    |           |
|                      |                      |                      | Cryptosporangiaceae   |                     |                    |                     | Cryptosporangiaceae   |                       |                    |                    | Cryptosporangiaceae   |           |
|                      |                      |                      | Geodermatophilaceae   |                     |                    |                     | Geodermatophilaceae   |                       |                    |                    | Geodermatophilaceae   |           |
|                      |                      |                      | Glycomycetaceae       |                     |                    |                     | Glycomycetaceae       |                       |                    |                    | Glycomycetaceae       |           |
|                      |                      |                      | Intrasporangiaceae    |                     |                    |                     | Intrasporangiaceae    |                       |                    |                    | Intrasporangiaceae    |           |
|                      |                      |                      | Kineosporiaceae       |                     |                    |                     | Kineosporiaceae       |                       |                    |                    | Kineosporiaceae       |           |
|                      |                      |                      | Microbacteriaceae     |                     |                    |                     | Microbacteriaceae     |                       |                    |                    | Microbacteriaceae     |           |
|                      |                      |                      | Micrococcaeae         |                     |                    |                     | Micrococcaeae         |                       |                    |                    | Micrococcaeae         |           |
|                      |                      |                      | Micromonosporaceae    |                     |                    |                     | Micromonosporaceae    |                       |                    |                    | Micromonosporaceae    |           |
|                      |                      |                      | Mycobacteriaceae      |                     |                    |                     | Mycobacteriaceae      |                       |                    |                    | Mycobacteriaceae      |           |
|                      |                      |                      | Naikamurellaceae      |                     |                    |                     | Naikamurellaceae      |                       |                    |                    | Naikamurellaceae      |           |
|                      |                      |                      | Nocardiaceae          |                     |                    |                     | Nocardiaceae          |                       |                    |                    | Nocardiaceae          |           |
|                      |                      |                      | Nocardioideae         |                     |                    |                     | Nocardioideae         |                       |                    |                    | Nocardioideae         |           |
|                      |                      |                      | Promicromonosporaceae |                     |                    |                     | Promicromonosporaceae |                       |                    |                    | Promicromonosporaceae |           |
|                      |                      |                      | Propionibacteriaceae  |                     |                    |                     | Propionibacteriaceae  |                       |                    |                    | Propionibacteriaceae  |           |
|                      |                      |                      | Pseudonocardiaceae    |                     |                    |                     | Pseudonocardiaceae    |                       |                    |                    | Pseudonocardiaceae    |           |
|                      |                      |                      | Sporichthyaceae       |                     |                    |                     | Sporichthyaceae       |                       |                    |                    | Sporichthyaceae       |           |
|                      |                      |                      | Streptomycetaceae     |                     |                    |                     | Streptomycetaceae     |                       |                    |                    | Streptomycetaceae     |           |
|                      |                      |                      | Streptosporangiaceae  |                     |                    |                     | Streptosporangiaceae  |                       |                    |                    | Streptosporangiaceae  |           |
|                      |                      |                      | Thermomonosporaceae   |                     |                    |                     | Thermomonosporaceae   |                       |                    |                    | Thermomonosporaceae   |           |
|                      |                      |                      | unclassified          |                     |                    |                     | unclassified          |                       |                    |                    | unclassified          |           |
|                      |                      |                      | Bifidobacteriales     |                     |                    |                     | Bifidobacteriales     |                       |                    |                    | Bifidobacteriales     |           |
| Solirubrobacteriales | Solirubrobacteriales | Solirubrobacteriales |                       |                     |                    |                     |                       |                       |                    |                    |                       |           |
| unclassified         | unclassified         | unclassified         |                       |                     |                    |                     |                       |                       |                    |                    |                       |           |
| unclassified         | unclassified         | unclassified         |                       |                     |                    |                     |                       |                       |                    |                    |                       |           |
| Flavobacteria        | Flavobacteria        | Flavobacteriales     | Flavobacteria         | Flavobacteria       | Flavobacteriales   | Flavobacteria       | Flavobacteriales      | Flavobacteria         | Flavobacteriales   | Flavobacteriales   | Flavobacteriales      |           |
| Cryomorphaceae       | Cryomorphaceae       | Cryomorphales        | Cryomorphaceae        | Cryomorphaceae      | Cryomorphales      | Cryomorphaceae      | Cryomorphales         | Cryomorphaceae        | Cryomorphales      | Cryomorphales      | Cryomorphaceae        |           |
| Flavobacteriaceae    | Flavobacteriaceae    | Flavobacteriales     | Flavobacteriaceae     | Flavobacteriaceae   | Flavobacteriales   | Flavobacteriaceae   | Flavobacteriales      | Flavobacteriaceae     | Flavobacteriales   | Flavobacteriales   | Flavobacteriaceae     |           |
| Chitinophagaceae     | Chitinophagaceae     | Chitinophagales      | Chitinophagaceae      | Chitinophagaceae    | Chitinophagales    | Chitinophagaceae    | Chitinophagales       | Chitinophagaceae      | Chitinophagales    | Chitinophagales    | Chitinophagaceae      |           |
| Cytophagaceae        | Cytophagaceae        | Cytophagales         | Cytophagaceae         | Cytophagaceae       | Cytophagales       | Cytophagaceae       | Cytophagales          | Cytophagaceae         | Cytophagales       | Cytophagales       | Cytophagaceae         |           |
| Sphingobacteriaceae  | Sphingobacteriaceae  | Sphingobacteriales   | Sphingobacteriaceae   | Sphingobacteriaceae | Sphingobacteriales | Sphingobacteriaceae | Sphingobacteriales    | Sphingobacteriaceae   | Sphingobacteriales | Sphingobacteriales | Sphingobacteriaceae   |           |
| unclassified         | unclassified         | unclassified         | unclassified          | unclassified        | unclassified       | unclassified        | unclassified          | unclassified          | unclassified       | unclassified       | unclassified          |           |
| Chlamydiae           | Chlamydiae           | Chlamydiales         | Parachlamydiaceae     | Chlamydiae          | Chlamydiales       | Chlamydiales        | Parachlamydiaceae     | Chlamydiae            | Chlamydiales       | Chlamydiales       | Parachlamydiaceae     |           |
| Chloroflexi          | Chloroflexi          | unclassified         | Chloroflexi           | Chloroflexi         | unclassified       | unclassified        | unclassified          | Chloroflexi           | Chloroflexi        | unclassified       | unclassified          |           |
| unclassified         | unclassified         | unclassified         | unclassified          | unclassified        | unclassified       | unclassified        | unclassified          | unclassified          | unclassified       | unclassified       | unclassified          |           |
| unclassified         | unclassified         | unclassified         | unclassified          | unclassified        | unclassified       | unclassified        | unclassified          | unclassified          | unclassified       | unclassified       | unclassified          |           |
| unclassified         | unclassified         | unclassified         | unclassified          | unclassified        | unclassified       | unclassified        | unclassified          | unclassified          | unclassified       | unclassified       | unclassified          |           |
| Deinococcus          | Deinococci           | Deinococcales        | Deinococcaceae        | Deinococcus         | Deinococci         | Deinococcales       | Deinococcaceae        | Deinococcus           | Deinococci         | Deinococcales      | Deinococcaceae        |           |
| Firmicutes           | Firmicutes           | Firmicutes           | Alicyclobacillaceae   | Firmicutes          | Firmicutes         | Firmicutes          | Alicyclobacillaceae   | Firmicutes            | Firmicutes         | Firmicutes         | Alicyclobacillaceae   |           |
|                      |                      |                      | Bacillaceae           |                     |                    |                     | Bacillaceae           |                       |                    |                    | Bacillaceae           |           |
|                      |                      |                      | Paenibacillaceae      |                     |                    |                     | Paenibacillaceae      |                       |                    |                    | Paenibacillaceae      |           |
|                      |                      |                      | Planococcaceae        |                     |                    |                     | Planococcaceae        |                       |                    |                    | Planococcaceae        |           |
|                      |                      |                      | Staphylococcaceae     |                     |                    |                     | Staphylococcaceae     |                       |                    |                    | Staphylococcaceae     |           |
|                      |                      |                      | Thermoactinomyces     |                     |                    |                     | Thermoactinomyces     |                       |                    |                    | Thermoactinomyces     |           |
|                      |                      |                      | unclassified          |                     |                    |                     | unclassified          |                       |                    |                    | unclassified          |           |
|                      |                      |                      | Enterococcaceae       |                     |                    |                     | Enterococcaceae       |                       |                    |                    | Enterococcaceae       |           |
|                      |                      |                      | Streptococcaceae      |                     |                    |                     | Streptococcaceae      |                       |                    |                    | Streptococcaceae      |           |
|                      |                      |                      | unclassified          |                     |                    |                     | unclassified          |                       |                    |                    | unclassified          |           |
|                      |                      |                      | Clostridiaceae        |                     |                    |                     | Clostridiaceae        |                       |                    |                    | Clostridiaceae        |           |
|                      |                      |                      | Gracilbacteraceae     |                     |                    |                     | Gracilbacteraceae     |                       |                    |                    | Gracilbacterales      |           |
|                      |                      |                      | Lachnospiraceae       |                     |                    |                     | Lachnospiraceae       |                       |                    |                    | Lachnospirales        |           |
|                      |                      |                      | Peptostreptococcaceae |                     |                    |                     | Peptostreptococcaceae |                       |                    |                    | Peptostreptococcales  |           |
|                      |                      |                      | Ruminococcaceae       |                     |                    |                     | Ruminococcaceae       |                       |                    |                    | Ruminococcales        |           |
|                      |                      |                      | unclassified          |                     |                    |                     | unclassified          |                       |                    |                    | unclassified          |           |
| Veillonellaceae      | Veillonellaceae      | Veillonellales       |                       |                     |                    |                     |                       |                       |                    |                    |                       |           |
| unclassified         | unclassified         | unclassified         |                       |                     |                    |                     |                       |                       |                    |                    |                       |           |
| Gemmatimonadetes     | Gemmatimonadetes     | Gemmatimonadales     | Gemmatimonadetes      | Gemmatimonadetes    | Gemmatimonadales   | Gemmatimonadetes    | Gemmatimonadales      | Gemmatimonadetes      | Gemmatimonadales   | Gemmatimonadales   | Gemmatimonadetes      |           |
| Nitrospira           | Nitrospira           | Nitrospirales        | Nitrospiraceae        | Nitrospira          | Nitrospira         | Nitrospirales       | Nitrospiraceae        | Nitrospira            | Nitrospira         | Nitrospirales      | Nitrospiraceae        |           |

**Table.S4 Part 2: Changes in taxonomic composition between bulk soil and rhizosphere samples for each soil type.** Text in red and blue indicates a significant increase in rhizosphere and bulks soils samples respectively. Samples are referred as follow: BS: Bulk Soil; Rh: Rhizosphere. The symbols '>' and '<' mean significantly more or less abundant and '=' not significantly different.

| CALCARIC CAMBISOL      |                      |                         |                                      |
|------------------------|----------------------|-------------------------|--------------------------------------|
| PHYLUM                 | CLASS                | ORDER                   | FAMILY                               |
| OP10                   | OP10                 | OP10                    | OP10                                 |
| Planctomycetes         | Planctomycetes       | Planctomycetales        | Planctomycetaceae                    |
| Proteobacteria         | Alpha-proteobacteria | Caulobacterales Rh>BS   | Caulobacteraceae Rh>BS               |
|                        |                      | unclassified            | Hyphomicrobiaceae Rh>BS              |
|                        |                      | Beijerinckiales         | Beijerinckiaceae                     |
|                        |                      | Bradyrhizobiales        | Bradyrhizobiaceae                    |
|                        |                      | Brucellales             | Brucellaceae                         |
|                        |                      | Hyphomicrobiales        | Hyphomicrobiaceae                    |
|                        |                      | Methylobacteriales      | Methylobacteriaceae                  |
|                        |                      | Methylocystales         | Methylocystaceae                     |
|                        |                      | Rhizobiales             | Phyllobacteriaceae Rh>BS             |
|                        |                      | Rhizobiales             | Rhizobiaceae                         |
| Rhodobacteriales Rh>BS | Rhodobiaceae Rh>BS   |                         |                                      |
| Rhodospirillales       | Rhodospirillaceae    |                         |                                      |
| Rickettsiales          | Rickettsiaceae       |                         |                                      |
| Sphingomonadales       | Sphingomonadaceae    |                         |                                      |
| unclassified           | unclassified         |                         |                                      |
| Proteobacteria         | Beta-proteobacteria  | Burkholderiales Rh>BS   | Burkholderiales_incertae_sedis Rh>BS |
|                        |                      | Comamonadales           | Comamonadaceae Rh>BS                 |
|                        |                      | Oxalobacteriales        | Oxalobacteraceae                     |
|                        |                      | Methylophilales         | Methylophilaceae                     |
|                        |                      | Neisseriales            | Neisseriaceae                        |
|                        |                      | Nitrosomonadales        | Nitrosomonadaceae                    |
|                        |                      | Rhodocyclales Rh>BS     | Rhodocyclaceae Rh>BS                 |
|                        |                      | unclassified BS>Rh      | unclassified BS>Rh                   |
|                        |                      | Bdellovibrionales BS>Rh | Bacteriovoraceae                     |
|                        |                      | Desulfobacteriales      | Bdellovibrionaceae                   |
| Desulfuromonadales     | Geobacteraceae       |                         |                                      |
| unclassified           | unclassified         |                         |                                      |
| Myxococcales BS>Rh     | Cystobacteraceae     |                         |                                      |
| unclassified BS>Rh     | Haliangiaceae        |                         |                                      |
| unclassified BS>Rh     | Kofteriaceae         |                         |                                      |
| unclassified BS>Rh     | nnocystaceae         |                         |                                      |
| unclassified BS>Rh     | Polyangiaceae        |                         |                                      |
| unclassified BS>Rh     | unclassified BS>Rh   |                         |                                      |
| unclassified BS>Rh     | unclassified BS>Rh   |                         |                                      |
| Aeromonadales          | Aeromonadaceae       |                         |                                      |
| Alteromonadales        | Alteromonadaceae     |                         |                                      |
| Chromatiales           | Chromatiaceae        |                         |                                      |
| Enterobacteriales      | Enterobacteriaceae   |                         |                                      |
| Moraxellales           | Moraxellaceae        |                         |                                      |
| Pseudomonadales        | Pseudomonadaceae     |                         |                                      |
| unclassified           | unclassified         |                         |                                      |
| Sinobacteriales        | Sinobacteraceae      |                         |                                      |
| unclassified           | unclassified         |                         |                                      |
| Xanthomonadales        | Xanthomonadaceae     |                         |                                      |
| unclassified           | unclassified         |                         |                                      |
| Spirochaetes Rh>BS     | Spirochaetes Rh>BS   | Spirochaetales Rh>BS    | Leptospiraceae ND                    |
| TM7 Rh>BS              | TM7 Rh>BS            | TM7 Rh>BS               | Spirochaetaceae ND                   |
| unclassified           | unclassified         | unclassified            | unclassified                         |
| Verrucomicrobia        | Oplitutae            | Oplitutales             | Oplitaceae                           |
| unclassified           | Spartobacteria       | Spartobacteria          | Spartobacteriaceae                   |
| unclassified           | Subdivision3         | Subdivision3            | Subdivision3                         |
| unclassified           | unclassified         | unclassified            | unclassified                         |
| WS3                    | WS3                  | WS3                     | unclassified                         |

  

| EUTRIC CAMBISOL       |                           |                         |                                      |
|-----------------------|---------------------------|-------------------------|--------------------------------------|
| PHYLUM                | CLASS                     | ORDER                   | FAMILY                               |
| OP10                  | OP10                      | genera                  | incertae                             |
| Planctomycetes ND     | Planctomycetacia ND       | Planctomycetales ND     | Planctomycetaceae ND                 |
| Proteobacteria        | Alpha-proteobacteria      | Caulobacterales         | Caulobacteraceae                     |
|                       |                           | unclassified            | Hyphomicrobiaceae                    |
|                       |                           | Rhizobiales Rh>BS       | Beijerinckiaceae Rh>BS               |
|                       |                           | Bradyrhizobiales Rh>BS  | Bradyrhizobiaceae Rh>BS              |
|                       |                           | Brucellales ND          | Brucellaceae ND                      |
|                       |                           | Hyphomicrobiales        | Hyphomicrobiaceae                    |
|                       |                           | Methylobacteriales ND   | Methylobacteriaceae ND               |
|                       |                           | Methylocystales         | Methylocystaceae                     |
|                       |                           | Phyllobacteriales Rh>BS | Phyllobacteriaceae Rh>BS             |
|                       |                           | Rhizobiales Rh>BS       | Rhizobiaceae Rh>BS                   |
| Rhodobacteriales      | Rhodobiaceae              |                         |                                      |
| Rhodospirillales      | Rhodospirillaceae Rh>BS   |                         |                                      |
| Rickettsiales         | Rickettsiaceae            |                         |                                      |
| Sphingomonadales      | Sphingomonadaceae         |                         |                                      |
| unclassified          | unclassified              |                         |                                      |
| Proteobacteria        | Beta-proteobacteria Rh>BS | Burkholderiales Rh>BS   | Alcaligenaceae ND                    |
|                       |                           | unclassified            | Burkholderiaceae Rh>BS               |
|                       |                           | unclassified            | Burkholderiales_incertae_sedis Rh>BS |
|                       |                           | Comamonadales           | Comamonadaceae                       |
|                       |                           | Oxalobacteriales        | Oxalobacteraceae                     |
|                       |                           | Methylophilales         | Methylophilaceae                     |
|                       |                           | Neisseriales ND         | Neisseriaceae ND                     |
|                       |                           | Nitrosomonadales        | Nitrosomonadaceae                    |
|                       |                           | Rhodocyclales           | Rhodocyclaceae                       |
|                       |                           | unclassified            | unclassified                         |
| Bdellovibrionales     | Bacteriovoraceae          |                         |                                      |
| Desulfobacteriales ND | Bdellovibrionaceae        |                         |                                      |
| Desulfuromonadales    | Geobacteraceae            |                         |                                      |
| unclassified          | unclassified              |                         |                                      |
| Myxococcales          | Cystobacteraceae          |                         |                                      |
| unclassified          | Haliangiaceae ND          |                         |                                      |
| unclassified          | Kofteriaceae              |                         |                                      |
| unclassified          | Nannocystaceae ND         |                         |                                      |
| unclassified          | Polyangiaceae             |                         |                                      |
| unclassified          | unclassified              |                         |                                      |
| unclassified          | unclassified              |                         |                                      |
| Aeromonadales         | Aeromonadaceae            |                         |                                      |
| Alteromonadales ND    | Alteromonadaceae ND       |                         |                                      |
| Chromatiales ND       | Chromatiaceae ND          |                         |                                      |
| Enterobacteriales     | Enterobacteriaceae        |                         |                                      |
| Moraxellales          | Moraxellaceae             |                         |                                      |
| Pseudomonadales       | Pseudomonadaceae          |                         |                                      |
| unclassified          | unclassified              |                         |                                      |
| Sinobacteriales       | Sinobacteraceae           |                         |                                      |
| unclassified          | unclassified              |                         |                                      |
| Xanthomonadales       | Xanthomonadaceae          |                         |                                      |
| unclassified          | unclassified              |                         |                                      |
| Spirochaetes          | Spirochaetes              | Spirochaetales          | Leptospiraceae ND                    |
| TM7 Rh>BS             | TM7 Rh>BS                 | TM7 Rh>BS               | Spirochaetaceae ND                   |
| unclassified          | unclassified              | unclassified            | unclassified                         |
| Verrucomicrobia       | Oplitutae ND              | Oplitutales ND          | Oplitaceae ND                        |
| unclassified          | Spartobacteria            | Spartobacteria          | Spartobacteriaceae ND                |
| unclassified          | Subdivision3              | Subdivision3            | Subdivision3                         |
| unclassified          | unclassified              | unclassified            | unclassified                         |
| WS3 ND                | WS3 ND                    | WS3 ND                  | WS3 ND                               |

  

| HYPERDYSTRIC CAMBISOL |                         |                         |                                      |
|-----------------------|-------------------------|-------------------------|--------------------------------------|
| PHYLUM                | CLASS                   | ORDER                   | FAMILY                               |
| OP10                  | OP10                    | genera                  | incertae                             |
| Planctomycetes ND     | Planctomycetacia ND     | Planctomycetales ND     | Planctomycetaceae ND                 |
| Proteobacteria        | Alpha-proteobacteria    | Caulobacterales Rh>BS   | Caulobacteraceae Rh>BS               |
|                       |                         | unclassified            | Hyphomicrobiaceae                    |
|                       |                         | Beijerinckiales Rh>BS   | Beijerinckiaceae Rh>BS               |
|                       |                         | Bradyrhizobiales Rh>BS  | Bradyrhizobiaceae Rh>BS              |
|                       |                         | Brucellales             | Brucellaceae                         |
|                       |                         | Hyphomicrobiales        | Hyphomicrobiaceae                    |
|                       |                         | Methylobacteriales      | Methylobacteriaceae                  |
|                       |                         | Methylocystales         | Methylocystaceae                     |
|                       |                         | Phyllobacteriales Rh>BS | Phyllobacteriaceae Rh>BS             |
|                       |                         | Rhizobiales Rh>BS       | Rhizobiaceae Rh>BS                   |
| Rhodobacteriales      | Rhodobiaceae            |                         |                                      |
| Rhodospirillales      | Rhodospirillaceae Rh>BS |                         |                                      |
| Rickettsiales         | Rickettsiaceae          |                         |                                      |
| Sphingomonadales      | Sphingomonadaceae       |                         |                                      |
| unclassified          | unclassified            |                         |                                      |
| Proteobacteria        | Beta-proteobacteria     | Burkholderiales Rh>BS   | Alcaligenaceae                       |
|                       |                         | unclassified            | Burkholderiaceae Rh>BS               |
|                       |                         | unclassified            | Burkholderiales_incertae_sedis Rh>BS |
|                       |                         | Comamonadales           | Comamonadaceae                       |
|                       |                         | Oxalobacteriales        | Oxalobacteraceae                     |
|                       |                         | Methylophilales         | Methylophilaceae                     |
|                       |                         | Neisseriales            | Neisseriaceae                        |
|                       |                         | Nitrosomonadales        | Nitrosomonadaceae                    |
|                       |                         | Rhodocyclales           | Rhodocyclaceae                       |
|                       |                         | unclassified            | unclassified                         |
| Bdellovibrionales     | Bacteriovoraceae        |                         |                                      |
| Desulfobacteriales ND | Bdellovibrionaceae      |                         |                                      |
| Desulfuromonadales ND | Geobacteraceae          |                         |                                      |
| unclassified ND       | unclassified ND         |                         |                                      |
| Myxococcales          | Cystobacteraceae        |                         |                                      |
| unclassified          | Haliangiaceae           |                         |                                      |
| unclassified          | Kofteriaceae            |                         |                                      |
| unclassified          | Nannocystaceae          |                         |                                      |
| unclassified          | Polyangiaceae           |                         |                                      |
| unclassified          | unclassified            |                         |                                      |
| unclassified          | unclassified            |                         |                                      |
| Aeromonadales ND      | Aeromonadaceae ND       |                         |                                      |
| Alteromonadales ND    | Alteromonadaceae ND     |                         |                                      |
| Chromatiales ND       | Chromatiaceae ND        |                         |                                      |
| Enterobacteriales     | Enterobacteriaceae      |                         |                                      |
| Moraxellales          | Moraxellaceae           |                         |                                      |
| Pseudomonadales       | Pseudomonadaceae        |                         |                                      |
| unclassified          | unclassified            |                         |                                      |
| Sinobacteriales       | Sinobacteraceae         |                         |                                      |
| unclassified          | unclassified            |                         |                                      |
| Xanthomonadales       | Xanthomonadaceae Rh>BS  |                         |                                      |
| unclassified Rh>BS    | unclassified Rh>BS      |                         |                                      |
| unclassified Rh>BS    | unclassified Rh>BS      |                         |                                      |
| unclassified Rh>BS    | unclassified Rh>BS      |                         |                                      |
| Spirochaetes ND       | Spirochaetes ND         | Spirochaetales ND       | Leptospiraceae ND                    |
| TM7                   | TM7                     | TM7                     | Spirochaetaceae ND                   |
| unclassified          | unclassified            | unclassified            | unclassified                         |
| Verrucomicrobia       | Oplitutae ND            | Oplitutales ND          | Oplitaceae ND                        |
| unclassified          | Spartobacteria          | Spartobacteria          | Spartobacteriaceae ND                |
| unclassified          | Subdivision3            | Subdivision3            | Subdivision3                         |
| unclassified          | unclassified            | unclassified            | unclassified                         |
| WS3 ND                | WS3 ND                  | WS3 ND                  | WS3 ND                               |

**Table.S5 Relative abundance (in %) of the bacterial genera that constituted the rhizosphere/core OTUs along the soil toposequence. Each value is the mean of biological replicates ( $\pm$  Standard Error of the Mean).**

| Phylum          | Class                    | Order               | Family                   | Genus             | Calcaric |      | Eutric |      | Hyperdystric |      |
|-----------------|--------------------------|---------------------|--------------------------|-------------------|----------|------|--------|------|--------------|------|
|                 |                          |                     |                          |                   | mean     | sem  | mean   | sem  | mean         | sem  |
| Acidobacteria   | Acidobacteria_Gp2        | Gp2                 | unclassified             | unclassified      | 0.61     | 0.35 | 17.30  | 2.76 | 17.93        | 1.62 |
| Acidobacteria   | Acidobacteria_Gp3        | Gp3                 | unclassified             | unclassified      | 1.89     | 0.34 | 4.44   | 0.38 | 6.45         | 0.79 |
| Actinobacteria  | Actinobacteria           | Acidimicrobiales    | Acidimicrobinae          | unclassified      | 3.97     | 0.47 | 0.37   | 0.13 | 0.58         | 0.07 |
| Actinobacteria  | Actinobacteria           | Acidimicrobiales    | lamiaceae                | lamia             | 0.24     | 0.11 | 0.09   | 0.01 | 0.52         | 0.28 |
| Actinobacteria  | Actinobacteria           | Acidimicrobiales    | unclassified             | unclassified      | 1.00     | 0.13 | 0.45   | 0.17 | 0.14         | 0.05 |
| Actinobacteria  | Actinobacteria           | Actinomycetales     | Micromonosporaceae       | unclassified      | 0.87     | 0.14 | 0.17   | 0.04 | 0.45         | 0.14 |
| Actinobacteria  | Actinobacteria           | Actinomycetales     | Mycobacteriaceae         | Mycobacterium     | 23.40    | 6.42 | 15.14  | 2.35 | 7.99         | 1.01 |
| Actinobacteria  | Actinobacteria           | Actinomycetales     | Streptomycetaceae        | unclassified      | 2.43     | 0.59 | 0.79   | 0.24 | 0.91         | 0.51 |
| Actinobacteria  | Actinobacteria           | Actinomycetales     | Streptosporangineae      | unclassified      | 0.12     | 0.05 | 0.16   | 0.04 | 0.17         | 0.04 |
| Actinobacteria  | Actinobacteria           | Actinomycetales     | unclassified             | unclassified      | 0.91     | 0.20 | 17.81  | 2.20 | 20.92        | 2.72 |
| Actinobacteria  | Actinobacteria           | Solirubrobacterales | Conexibacteraceae        | unclassified      | 0.75     | 0.16 | 1.87   | 0.60 | 0.70         | 0.12 |
| Actinobacteria  | Actinobacteria           | Solirubrobacterales | unclassified             | unclassified      | 4.24     | 0.98 | 2.39   | 1.16 | 0.24         | 0.07 |
| Actinobacteria  | Actinobacteria           | unclassified        | unclassified             | unclassified      | 4.70     | 0.84 | 3.52   | 0.77 | 2.00         | 0.46 |
| Bacteroidetes   | Sphingobacteria          | Sphingobacteriales  | Chitinophagaceae         | unclassified      | 1.28     | 0.41 | 1.38   | 0.33 | 2.85         | 0.79 |
| Bacteroidetes   | Sphingobacteria          | Sphingobacteriales  | Cytophagaceae            | unclassified      | 0.56     | 0.06 | 0.46   | 0.17 | 0.47         | 0.14 |
| Chloroflexi     | unclassified_Chloroflexi | unclassified        | unclassified             | unclassified      | 0.52     | 0.11 | 0.08   | 0.03 | 0.18         | 0.07 |
| Nitrospira      | Nitrospira               | Nitrospirales       | Nitrospiraceae           | Nitrospira        | 0.33     | 0.05 | 0.34   | 0.06 | 1.50         | 0.08 |
| Proteobacteria  | Alphaproteobacteria      | Caulobacterales     | Caulobacteraceae         | Phenyllobacterium | 1.93     | 0.38 | 1.69   | 0.15 | 1.44         | 0.19 |
| Proteobacteria  | Alphaproteobacteria      | Caulobacterales     | Caulobacteraceae         | unclassified      | 0.21     | 0.06 | 0.58   | 0.17 | 1.37         | 0.08 |
| Proteobacteria  | Alphaproteobacteria      | Rhizobiales         | Bradyrhizobiaceae        | Bradyrhizobium    | 10.45    | 1.88 | 9.75   | 1.44 | 9.23         | 1.17 |
| Proteobacteria  | Alphaproteobacteria      | Rhizobiales         | Bradyrhizobiaceae        | unclassified      | 0.39     | 0.33 | 0.26   | 0.08 | 0.26         | 0.05 |
| Proteobacteria  | Alphaproteobacteria      | Rhizobiales         | Hyphomicrobiaceae        | Rhodoplanes       | 12.26    | 1.79 | 1.04   | 0.11 | 0.52         | 0.11 |
| Proteobacteria  | Alphaproteobacteria      | Rhizobiales         | Hyphomicrobiaceae        | unclassified      | 0.78     | 0.16 | 0.30   | 0.04 | 0.71         | 0.08 |
| Proteobacteria  | Alphaproteobacteria      | Rhizobiales         | unclassified_Rhizobiales | unclassified      | 0.87     | 0.28 | 1.07   | 0.28 | 1.62         | 0.09 |
| Proteobacteria  | Alphaproteobacteria      | Rhizobiales         | unclassified             | unclassified      | 0.81     | 0.32 | 2.02   | 0.41 | 2.19         | 0.52 |
| Proteobacteria  | Alphaproteobacteria      | Rhizobiales         | Xanthobacteraceae        | Pseudolabrys      | 0.56     | 0.27 | 0.32   | 0.19 | 0.30         | 0.17 |
| Proteobacteria  | Alphaproteobacteria      | Rhodospirillales    | unclassified             | unclassified      | 1.41     | 0.58 | 2.07   | 0.25 | 1.45         | 0.26 |
| Proteobacteria  | Alphaproteobacteria      | unclassified        | unclassified             | unclassified      | 7.24     | 1.03 | 1.71   | 0.22 | 1.74         | 0.35 |
| Proteobacteria  | Betaproteobacteria       | unclassified        | unclassified             | unclassified      | 0.33     | 0.11 | 0.33   | 0.03 | 0.09         | 0.02 |
| Proteobacteria  | Deltaproteobacteria      | Myxococcales        | Cystobacterineae         | unclassified      | 0.53     | 0.13 | 0.13   | 0.03 | 0.55         | 0.07 |
| Proteobacteria  | Deltaproteobacteria      | Myxococcales        | Sorangineae              | Polyangiaceae     | 1.83     | 0.44 | 0.23   | 0.03 | 0.49         | 0.06 |
| Proteobacteria  | Deltaproteobacteria      | Myxococcales        | Sorangineae              | unclassified      | 0.76     | 0.13 | 0.25   | 0.02 | 0.36         | 0.06 |
| Proteobacteria  | Deltaproteobacteria      | unclassified        | unclassified             | unclassified      | 3.46     | 0.51 | 0.70   | 0.13 | 0.41         | 0.07 |
| Proteobacteria  | Gammaproteobacteria      | Xanthomonadales     | Sinobacteraceae          | Steroidobacter    | 0.86     | 0.28 | 5.61   | 0.82 | 7.87         | 0.84 |
| Proteobacteria  | Gammaproteobacteria      | Xanthomonadales     | Xanthomonadaceae         | unclassified      | 0.82     | 0.39 | 0.87   | 0.22 | 0.10         | 0.03 |
| Proteobacteria  | unclassified             | unclassified        | unclassified             | unclassified      | 2.43     | 0.54 | 1.96   | 0.48 | 2.53         | 0.63 |
| unclassified    | unclassified             | unclassified        | unclassified             | unclassified      | 2.32     | 0.38 | 0.87   | 0.08 | 1.93         | 0.38 |
| Verrucomicrobia | Subdivision3             | Subdivision3        | unclassified             | unclassified      | 1.93     | 0.32 | 1.51   | 0.22 | 0.83         | 0.13 |



**Table.S6 Relative abundance (in %) of the bacterial genera that constituted the acidic rhizosphere/core OTUs in Cambisol Eutric and Hyperdystric.**

Each value is the mean of biological replicates ( $\pm$  Standard Error of the Mean).

| Phylum           | Class                      | Order               | Family                         | Genus             | Eutric     |            | Hyperdystric |            |
|------------------|----------------------------|---------------------|--------------------------------|-------------------|------------|------------|--------------|------------|
|                  |                            |                     |                                |                   | mean       | sem        | mean         | sem        |
| Acidobacteria    | Acidobacteria_Gp1          | Gp1                 | unclassified                   | unclassified      | 7.1619708  | 1.26508868 | 4.27473571   | 0.76908305 |
| Acidobacteria    | Acidobacteria_Gp2          | Gp2                 | unclassified                   | unclassified      | 10.7687284 | 1.69642531 | 9.65769631   | 2.20669787 |
| Acidobacteria    | Acidobacteria_Gp3          | Gp3                 | unclassified                   | unclassified      | 3.92180598 | 0.14366937 | 3.75323336   | 0.87623791 |
| Acidobacteria    | unclassified               | unclassified        | unclassified                   | unclassified      | 2.29702904 | 0.52333814 | 2.01737297   | 0.54886993 |
| Actinobacteria   | Actinobacteria             | Acidimicrobiales    | lamiaceae                      | lamia             | 0.94281404 | 0.11548958 | 0.82031669   | 0.13818892 |
| Actinobacteria   | Actinobacteria             | Acidimicrobiales    | unclassified                   | unclassified      | 1.32951199 | 0.15983938 | 1.10607781   | 0.0470451  |
| Actinobacteria   | Actinobacteria             | Actinomycetales     | Actinospicaceae                | Actinospica       | 2.19872497 | 0.32889383 | 6.45704419   | 2.2678257  |
| Actinobacteria   | Actinobacteria             | Actinomycetales     | Catenulisporaceae              | Catenulispora     | 0.74501019 | 0.26889465 | 0.77948347   | 0.16668271 |
| Actinobacteria   | Actinobacteria             | Actinomycetales     | Micromonosporaceae             | unclassified      | 0.07408839 | 0.02259253 | 0.11129536   | 0.03648324 |
| Actinobacteria   | Actinobacteria             | Actinomycetales     | Mycobacteriaceae               | Mycobacterium     | 6.4638048  | 1.19515787 | 2.06165288   | 0.20265768 |
| Actinobacteria   | Actinobacteria             | Actinomycetales     | Streptomycetaceae              | Streptacidiphilus | 2.9649012  | 0.40010128 | 7.0291416    | 3.50255433 |
| Actinobacteria   | Actinobacteria             | Actinomycetales     | Streptomycetaceae              | unclassified      | 0.32932238 | 0.09226806 | 0.21670263   | 0.11662585 |
| Actinobacteria   | Actinobacteria             | Actinomycetales     | unclassified                   | unclassified      | 10.6838015 | 1.11448578 | 7.77892647   | 0.4149742  |
| Actinobacteria   | Actinobacteria             | Solirubrobacterales | Conexibacteraceae              | Conexibacter      | 2.176975   | 0.51994115 | 0.59076219   | 0.10718727 |
| Actinobacteria   | Actinobacteria             | Solirubrobacterales | unclassified                   | unclassified      | 1.12834373 | 0.46229552 | 0.13496295   | 0.01234333 |
| Actinobacteria   | Actinobacteria             | unclassified        | unclassified                   | unclassified      | 1.86598982 | 0.37060741 | 0.76111444   | 0.11055591 |
| Bacteroidetes    | Sphingobacteria            | Sphingobacteriales  | Chitinophagaceae               | unclassified      | 1.53953432 | 0.24013384 | 2.27687827   | 0.39785909 |
| Bacteroidetes    | Sphingobacteria            | Sphingobacteriales  | Cytophagaceae                  | unclassified      | 0.20321017 | 0.08142207 | 0.12867373   | 0.0438941  |
| Bacteroidetes    | Sphingobacteria            | Sphingobacteriales  | Sphingobacteriaceae            | unclassified      | 0.42013405 | 0.08136681 | 0.60118857   | 0.06694591 |
| Chloroflexi      | unclassified_Chloroflexi   | unclassified        | unclassified                   | unclassified      | 0.03359409 | 0.01179497 | 0.04358075   | 0.01367039 |
| Gemmatimonadetes | Gemmatimonadetes           | Gemmatimonadales    | Gemmatimonadaceae              | Gemmatimonas      | 0.21175362 | 0.03619133 | 0.1133986    | 0.03639352 |
| Nitrospira       | Nitrospira                 | Nitrospirales       | Nitrospiraceae                 | Nitrospira        | 0.14642928 | 0.02771709 | 0.40262733   | 0.05605768 |
| OP10             | OP10_genera_incertae_sedis | unclassified        | unclassified                   | unclassified      | 0.03950047 | 0.00799948 | 0.05950277   | 0.01894935 |
| Proteobacteria   | Alphaproteobacteria        | Caulobacterales     | Caulobacteraceae               | Phenyllobacterium | 0.71866159 | 0.08445406 | 0.38543977   | 0.07804105 |
| Proteobacteria   | Alphaproteobacteria        | Caulobacterales     | Caulobacteraceae               | unclassified      | 0.27666577 | 0.07785411 | 0.38305028   | 0.05257617 |
| Proteobacteria   | Alphaproteobacteria        | Rhizobiales         | Beijerinckiaceae               | unclassified      | 0.17879214 | 0.02629573 | 0.35904672   | 0.1073096  |
| Proteobacteria   | Alphaproteobacteria        | Rhizobiales         | Bradyrhizobiaceae              | Bradyrhizobium    | 4.05890381 | 0.51088834 | 2.52356078   | 0.55834465 |
| Proteobacteria   | Alphaproteobacteria        | Rhizobiales         | Bradyrhizobiaceae              | unclassified      | 0.22283857 | 0.04427219 | 0.15402185   | 0.03720198 |
| Proteobacteria   | Alphaproteobacteria        | Rhizobiales         | Hypomicrobiaceae               | Rhodoplanes       | 0.44172633 | 0.05529381 | 0.14292912   | 0.04561979 |
| Proteobacteria   | Alphaproteobacteria        | Rhizobiales         | Hypomicrobiaceae               | unclassified      | 0.12948631 | 0.0221265  | 0.19393693   | 0.03695086 |
| Proteobacteria   | Alphaproteobacteria        | Rhizobiales         | Rhizobiaceae                   | Rhizobium         | 0.23367647 | 0.04889463 | 0.22006675   | 0.05441965 |
| Proteobacteria   | Alphaproteobacteria        | Rhizobiales         | unclassified                   | unclassified      | 2.86952085 | 0.23628056 | 2.98304448   | 0.96975125 |
| Proteobacteria   | Alphaproteobacteria        | Rhizobiales         | Xanthobacteraceae              | Labrys            | 0.25480139 | 0.06688175 | 0.07262743   | 0.0155729  |
| Proteobacteria   | Alphaproteobacteria        | Rhizobiales         | Xanthobacteraceae              | Pseudolabrys      | 0.15162902 | 0.09692308 | 0.0841106    | 0.0492838  |
| Proteobacteria   | Alphaproteobacteria        | Rhodospirillales    | Acetobacteraceae               | unclassified      | 0.58017519 | 0.09088377 | 0.46613032   | 0.13510524 |
| Proteobacteria   | Alphaproteobacteria        | Rhodospirillales    | unclassified                   | unclassified      | 2.48951269 | 0.29920027 | 1.95611745   | 0.48003991 |
| Proteobacteria   | Alphaproteobacteria        | unclassified        | unclassified                   | unclassified      | 2.2069181  | 0.15698593 | 1.91379023   | 0.35869423 |
| Proteobacteria   | Betaproteobacteria         | Burkholderiales     | Burkholderiaceae               | Burkholderia      | 0.992053   | 0.18199842 | 1.24394895   | 0.28202441 |
| Proteobacteria   | Betaproteobacteria         | Burkholderiales     | Burkholderiales_incertae_sedis | unclassified      | 0.20401604 | 0.05992309 | 0.59756128   | 0.18325457 |
| Proteobacteria   | Betaproteobacteria         | Burkholderiales     | Oxalobacteraceae               | Collimonas        | 0.15319064 | 0.04891661 | 0.31756524   | 0.14640665 |
| Proteobacteria   | Betaproteobacteria         | Burkholderiales     | Oxalobacteraceae               | Herbaspirillum    | 0.01939039 | 0.00505322 | 0.058756     | 0.02729537 |
| Proteobacteria   | Betaproteobacteria         | unclassified        | unclassified                   | unclassified      | 0.25552117 | 0.0441768  | 0.07587177   | 0.01621753 |
| Proteobacteria   | Deltaproteobacteria        | Myxococcales        | Polyangiaceae                  | unclassified      | 0.57167185 | 0.1151067  | 0.76041825   | 0.1959481  |
| Proteobacteria   | Deltaproteobacteria        | Myxococcales        | unclassified                   | unclassified      | 0.20876274 | 0.0306421  | 0.32626043   | 0.05238568 |
| Proteobacteria   | Deltaproteobacteria        | unclassified        | unclassified                   | unclassified      | 0.87364326 | 0.14526787 | 0.58954662   | 0.14488548 |
| Proteobacteria   | Gammaproteobacteria        | Xanthomonadales     | Sinobacteraceae                | Nevskia           | 0.04926228 | 0.02226176 | 0.19745547   | 0.03426669 |
| Proteobacteria   | Gammaproteobacteria        | Xanthomonadales     | Sinobacteraceae                | Steroidobacter    | 5.44268369 | 0.80333849 | 5.38357838   | 1.34269212 |
| Proteobacteria   | Gammaproteobacteria        | Xanthomonadales     | Xanthomonadaceae               | unclassified      | 0.81742254 | 0.21150983 | 0.3287248    | 0.06761882 |
| Proteobacteria   | unclassified               | unclassified        | unclassified                   | unclassified      | 0.80212447 | 0.18758711 | 0.71780224   | 0.24127958 |
| TM7              | TM7_genera_incertae_sedis  | unclassified        | unclassified                   | unclassified      | 0.33605932 | 0.13612436 | 2.62743007   | 1.09875336 |
| unclassified     | unclassified               | unclassified        | unclassified                   | unclassified      | 15.6211728 | 3.11325192 | 23.0291592   | 6.49041075 |
| Verrucomicrobia  | Subdivision3               | unclassified        | unclassified                   | unclassified      | 1.19273931 | 0.17086568 | 0.73167955   | 0.17550021 |

**Table S7:** Relative distribution of the functional categories of the Geochip in phyla and major classes according to the compartment (Rhizosphere, Rh and Bulk soil, BS) and the soil type (Calcaric, Eutric and Hyperdistic).

|                            | Relative signal expressed in % |      |        |      |             |      |
|----------------------------|--------------------------------|------|--------|------|-------------|------|
|                            | Calcaric                       |      | Eutric |      | Hyperdistic |      |
|                            | BS                             | Rh   | BS     | Rh   | BS          | Rh   |
| <b>Carbon cycling</b>      |                                |      |        |      |             |      |
| Actinobacteria             | 4.43                           | 4.20 | 4.16   | 4.23 | 4.41        | 4.26 |
| Alphaproteobacteria        | 2.30                           | 2.27 | 2.31   | 2.26 | 2.30        | 2.27 |
| Gammaproteobacteria        | 1.27                           | 1.35 | 1.33   | 1.32 | 1.26        | 1.33 |
| Firmicutes                 | 0.86                           | 0.89 | 0.92   | 0.90 | 0.87        | 0.90 |
| Betaproteobacteria         | 0.87                           | 0.90 | 0.89   | 0.89 | 0.88        | 0.89 |
|                            | Calcaric                       |      | Eutric |      | Hyperdistic |      |
| <b>Metal_homeostasis</b>   | BS                             | Rh   | BS     | Rh   | BS          | Rh   |
| Alphaproteobacteria        | 6.58                           | 6.56 | 6.50   | 6.50 | 6.58        | 6.58 |
| Actinobacteria             | 5.26                           | 5.13 | 5.06   | 5.09 | 5.30        | 5.07 |
| Gammaproteobacteria        | 4.09                           | 4.26 | 4.36   | 4.36 | 4.16        | 4.26 |
| Betaproteobacteria         | 3.72                           | 3.70 | 3.66   | 3.63 | 3.69        | 3.65 |
| Firmicutes                 | 1.40                           | 1.53 | 1.56   | 1.53 | 1.38        | 1.55 |
|                            | Calcaric                       |      | Eutric |      | Hyperdistic |      |
| <b>Nitrogen</b>            | BS                             | Rh   | BS     | Rh   | BS          | Rh   |
| Actinobacteria             | 0.48                           | 0.46 | 0.43   | 0.43 | 0.47        | 0.45 |
| Alphaproteobacteria        | 0.26                           | 0.26 | 0.26   | 0.27 | 0.27        | 0.26 |
| Betaproteobacteria         | 0.26                           | 0.25 | 0.26   | 0.26 | 0.26        | 0.26 |
| Gammaproteobacteria        | 0.23                           | 0.23 | 0.24   | 0.24 | 0.23        | 0.24 |
| Firmicutes                 | 0.10                           | 0.12 | 0.12   | 0.12 | 0.10        | 0.12 |
|                            | Calcaric                       |      | Eutric |      | Hyperdistic |      |
| <b>Organic remediation</b> | BS                             | Rh   | BS     | Rh   | BS          | Rh   |
| Alphaproteobacteria        | 2.51                           | 2.48 | 2.48   | 2.51 | 2.48        | 2.53 |
| Betaproteobacteria         | 1.69                           | 1.70 | 1.64   | 1.67 | 1.67        | 1.69 |
| Actinobacteria             | 1.41                           | 1.32 | 1.32   | 1.33 | 1.42        | 1.33 |
| Gammaproteobacteria        | 1.01                           | 1.06 | 1.07   | 1.05 | 1.03        | 1.05 |
| Firmicutes                 | 0.18                           | 0.19 | 0.20   | 0.20 | 0.18        | 0.20 |
|                            | Calcaric                       |      | Eutric |      | Hyperdistic |      |
| <b>Phosphorus</b>          | BS                             | Rh   | BS     | Rh   | BS          | Rh   |
| Alphaproteobacteria        | 0.48                           | 0.47 | 0.48   | 0.47 | 0.49        | 0.47 |
| Actinobacteria             | 0.47                           | 0.45 | 0.44   | 0.46 | 0.48        | 0.46 |
| Gammaproteobacteria        | 0.26                           | 0.25 | 0.26   | 0.27 | 0.26        | 0.26 |
| Betaproteobacteria         | 0.20                           | 0.20 | 0.20   | 0.20 | 0.21        | 0.20 |
| Firmicutes                 | 0.10                           | 0.11 | 0.11   | 0.11 | 0.10        | 0.11 |

  

| Distribution in classes (a,b,c) according to the p values |     |        |    |             |     |
|-----------------------------------------------------------|-----|--------|----|-------------|-----|
| Calcaric                                                  |     | Eutric |    | Hyperdistic |     |
| BS                                                        | Rh  | BS     | Rh | BS          | Rh  |
| b                                                         | a   | a      | a  | b           | a   |
| a                                                         | a   | a      | a  | a           | a   |
| b                                                         | a   | a      | a  | b           | a   |
| b                                                         | ab  | a      | ab | b           | ab  |
| b                                                         | a   | ab     | ab | ab          | ab  |
| Calcaric                                                  |     | Eutric |    | Hyperdistic |     |
| BS                                                        | Rh  | BS     | Rh | BS          | Rh  |
| b                                                         | ab  | a      | a  | b           | b   |
| b                                                         | a   | a      | a  | b           | a   |
| d                                                         | ab  | c      | ac | bd          | abc |
| b                                                         | ab  | ab     | a  | ab          | ab  |
| b                                                         | a   | a      | a  | b           | a   |
| Calcaric                                                  |     | Eutric |    | Hyperdistic |     |
| BS                                                        | Rh  | BS     | Rh | BS          | Rh  |
| a                                                         | a   | a      | a  | a           | a   |
| a                                                         | a   | a      | a  | a           | a   |
| a                                                         | a   | a      | a  | a           | a   |
| a                                                         | a   | ab     | b  | a           | ab  |
| b                                                         | a   | a      | a  | b           | a   |
| Calcaric                                                  |     | Eutric |    | Hyperdistic |     |
| BS                                                        | Rh  | BS     | Rh | BS          | Rh  |
| ab                                                        | a   | a      | ab | a           | b   |
| a                                                         | a   | b      | ab | ab          | a   |
| b                                                         | a   | a      | a  | b           | a   |
| c                                                         | ab  | a      | ab | bc          | abc |
| c                                                         | abc | b      | ab | ac          | ab  |
| Calcaric                                                  |     | Eutric |    | Hyperdistic |     |
| BS                                                        | Rh  | BS     | Rh | BS          | Rh  |
| a                                                         | a   | a      | a  | a           | a   |
| a                                                         | a   | a      | a  | a           | a   |
| a                                                         | a   | ab     | b  | ab          | ab  |
| a                                                         | a   | a      | a  | a           | a   |
| a                                                         | a   | a      | a  | a           | a   |

|                             | Calcaric |      | Eutric |      | Hyperdistric |      |
|-----------------------------|----------|------|--------|------|--------------|------|
| <b>Secondary_metabolism</b> | BS       | Rh   | BS     | Rh   | BS           | Rh   |
| Actinobacteria              | 1.19     | 1.10 | 1.07   | 1.10 | 1.17         | 1.12 |
| Alphaproteobacteria         | 0.75     | 0.74 | 0.74   | 0.74 | 0.77         | 0.73 |
| Gammaproteobacteria         | 0.27     | 0.28 | 0.29   | 0.28 | 0.27         | 0.28 |
| Betaproteobacteria          | 0.29     | 0.27 | 0.27   | 0.28 | 0.29         | 0.27 |
| Firmicutes                  | 0.06     | 0.06 | 0.07   | 0.07 | 0.06         | 0.06 |
|                             | Calcaric |      | Eutric |      | Hyperdistric |      |
| <b>Stress</b>               | BS       | Rh   | BS     | Rh   | BS           | Rh   |
| Alphaproteobacteria         | 4.50     | 4.48 | 4.39   | 4.40 | 4.38         | 4.47 |
| Actinobacteria              | 3.52     | 3.42 | 3.40   | 3.41 | 3.51         | 3.42 |
| Gammaproteobacteria         | 2.48     | 2.56 | 2.57   | 2.57 | 2.48         | 2.57 |
| Betaproteobacteria          | 1.83     | 1.83 | 1.80   | 1.82 | 1.86         | 1.82 |
| Firmicutes                  | 0.91     | 0.94 | 0.98   | 0.96 | 0.90         | 0.96 |
|                             | Calcaric |      | Eutric |      | Hyperdistric |      |
| <b>Sulfur</b>               | BS       | Rh   | BS     | Rh   | BS           | Rh   |
| Alphaproteobacteria         | 0.59     | 0.57 | 0.59   | 0.58 | 0.60         | 0.57 |
| Gammaproteobacteria         | 0.38     | 0.40 | 0.40   | 0.39 | 0.39         | 0.39 |
| Betaproteobacteria          | 0.27     | 0.30 | 0.28   | 0.29 | 0.28         | 0.29 |
| Actinobacteria              | 0.10     | 0.10 | 0.10   | 0.10 | 0.11         | 0.10 |
| Firmicutes                  | 0.07     | 0.07 | 0.07   | 0.07 | 0.07         | 0.07 |
|                             | Calcaric |      | Eutric |      | Hyperdistric |      |
| <b>Virulence</b>            | BS       | Rh   | BS     | Rh   | BS           | Rh   |
| Actinobacteria              | 8.52     | 7.95 | 7.89   | 7.88 | 8.46         | 7.92 |
| Gammaproteobacteria         | 3.71     | 3.77 | 3.79   | 3.84 | 3.76         | 3.74 |
| Alphaproteobacteria         | 3.19     | 3.31 | 3.23   | 3.23 | 3.21         | 3.21 |
| Betaproteobacteria          | 2.50     | 2.46 | 2.46   | 2.47 | 2.54         | 2.44 |
| Firmicutes                  | 0.33     | 0.38 | 0.40   | 0.38 | 0.34         | 0.39 |
|                             | Calcaric |      | Eutric |      | Hyperdistric |      |
| <b>CRISPR</b>               | BS       | Rh   | BS     | Rh   | BS           | Rh   |
| Firmicutes                  | 0.49     | 0.56 | 0.55   | 0.53 | 0.48         | 0.54 |
| Actinobacteria              | 0.45     | 0.44 | 0.45   | 0.45 | 0.46         | 0.45 |
| Gammaproteobacteria         | 0.36     | 0.37 | 0.38   | 0.38 | 0.36         | 0.38 |
| Alphaproteobacteria         | 0.29     | 0.29 | 0.29   | 0.29 | 0.28         | 0.29 |
| deltaproteobacteria         | 0.24     | 0.25 | 0.26   | 0.25 | 0.24         | 0.25 |

| Calcaric |    | Eutric |    | Hyperdistric |    |
|----------|----|--------|----|--------------|----|
| BS       | Rh | BS     | Rh | BS           | Rh |
| c        | ab | a      | ab | c            | b  |
| ab       | ab | ab     | ab | a            | b  |
| a        | a  | a      | a  | a            | a  |
| b        | a  | ab     | ab | ab           | a  |
| a        | a  | a      | a  | a            | a  |
| Calcaric |    | Eutric |    | Hyperdistric |    |
| BS       | Rh | BS     | Rh | BS           | Rh |
| a        | a  | a      | a  | a            | a  |
| b        | a  | a      | a  | b            | a  |
| b        | a  | a      | a  | b            | a  |
| a        | a  | a      | a  | a            | a  |
| a        | a  | a      | a  | a            | a  |
| Calcaric |    | Eutric |    | Hyperdistric |    |
| BS       | Rh | BS     | Rh | BS           | Rh |
| cd       | ab | cd     | ac | d            | b  |
| b        | a  | a      | ab | ab           | ab |
| a        | a  | a      | a  | a            | a  |
| a        | a  | a      | a  | a            | a  |
| b        | ab | ab     | ab | ab           | a  |
| Calcaric |    | Eutric |    | Hyperdistric |    |
| BS       | Rh | BS     | Rh | BS           | Rh |
| b        | a  | a      | a  | b            | a  |
| b        | ab | ab     | a  | ab           | b  |
| a        | a  | a      | a  | a            | a  |
| bc       | ab | ab     | ab | c            | a  |
| b        | a  | a      | a  | b            | a  |
| Calcaric |    | Eutric |    | Hyperdistric |    |
| BS       | Rh | BS     | Rh | BS           | Rh |
| b        | a  | a      | a  | b            | a  |
| a        | a  | a      | a  | a            | a  |
| c        | ab | a      | a  | bc           | a  |
| a        | a  | a      | a  | a            | a  |
| ab       | ab | a      | ab | b            | ab |

**Table.S8 Pearson correlation between soil parameters and the relative abundance of bacterial phyla in bulk soil samples.** The r-value is provided for significant correlations (\*\*P<0.01 and \*\*\*P<0.001).

|                       | pH        | Hum       | N.total  | C.total  | C.N | OM       | Limestone | ATE       | CEC      | H.        | Ca       | K         | Mg       | Na        | P.Duch. | P.Olsen | Mn        | Al        | Fe        |
|-----------------------|-----------|-----------|----------|----------|-----|----------|-----------|-----------|----------|-----------|----------|-----------|----------|-----------|---------|---------|-----------|-----------|-----------|
| Acidobacteria         | -0.784**  | -0.75**   | -0.805** | -0.8**   |     | -0.8**   | -0.816**  | 0.914***  | -0.815** | 0.841***  | -0.83*** | -0.765**  |          |           |         |         |           |           | 0.911***  |
| Bacteroidetes         | 0.978***  | 0.974***  | 0.967*** | 0.958*** |     | 0.958*** | 0.929***  | -0.932*** | 0.976*** | -0.954*** | 0.974*** | 0.964***  | 0.904*** | 0.937***  |         |         | -0.749**  | -0.914*** |           |
| Chloroflexi           | 0.875***  | 0.884***  | 0.87***  | 0.867*** |     | 0.867*** | 0.808**   | -0.865*** | 0.901*** | -0.887*** | 0.908*** | 0.912***  | 0.865*** | 0.785**   |         |         | -0.708**  | -0.846*** |           |
| Firmicutes            | 0.939***  | 0.943***  | 0.951*** | 0.942*** |     | 0.942*** | 0.982***  | -0.936*** | 0.958*** | -0.951*** | 0.962*** | 0.943***  | 0.872*** | 0.854***  |         |         | -0.713**  | -0.918*** |           |
| Gemmatimonadetes      | 0.769**   | 0.746**   |          |          |     |          |           |           | 0.718**  | -0.739**  | 0.712**  | 0.746**   |          | 0.816**   |         |         |           |           |           |
| Nitrospira            | 0.895***  | 0.863***  | 0.845*** | 0.823**  |     | 0.823**  | 0.887***  | -0.93***  | 0.892*** | -0.909*** | 0.901*** | 0.884***  | 0.727**  | 0.773**   |         |         |           |           | -0.922*** |
| Alphaproteobacteria   | 0.742**   | 0.75**    |          |          |     |          |           |           |          |           |          | 0.753**   |          | 0.822**   |         |         |           |           |           |
| Betaproteobacteria    | 0.981***  | 0.963***  | 0.944*** | 0.934*** |     | 0.934*** | 0.947***  | -0.957*** | 0.975*** | -0.973*** | 0.979*** | 0.966***  | 0.866*** | 0.912***  |         |         | -0.727**  | -0.939*** |           |
| Deltaproteobacteria   | 0.954***  | 0.938***  | 0.894*** | 0.876*** |     | 0.875*** | 0.916***  | -0.869*** | 0.938*** | -0.925*** | 0.938*** | 0.955***  | 0.827*** | 0.91***   |         |         | -0.789**  | -0.845*** |           |
| Gammaproteobacteria   | 0.744**   | 0.754**   |          |          |     |          |           |           | 0.718**  |           |          | 0.752**   |          | 0.803**   |         |         |           |           |           |
| Proteobacteria uncl.  | 0.988***  | 0.969***  | 0.947*** | 0.932*** |     | 0.932*** | 0.96***   | -0.945*** | 0.981*** | -0.975*** | 0.983*** | 0.979***  | 0.865*** | 0.925***  |         |         | -0.792**  | -0.923*** |           |
| Acidimicrobiales      | 0.892***  | 0.88***   | 0.888*** | 0.889*** |     | 0.889*** | 0.857***  | -0.817**  | 0.891*** | -0.896*** | 0.886*** | 0.86***   | 0.813**  | 0.842***  |         |         | -0.809**  | -0.777**  |           |
| Actinomycetales       | 0.72**    |           | 0.732**  | 0.734**  |     | 0.734**  |           |           |          |           |          |           |          | 0.715**   |         |         | -0.714**  |           |           |
| Solirubrobacterales   | 0.947***  | 0.942***  | 0.947*** | 0.946*** |     | 0.946*** | 0.902***  | -0.861*** | 0.941*** | -0.935*** | 0.934*** | 0.913***  | 0.874*** | 0.924***  |         |         | -0.824*** | -0.827*** |           |
| Actinomycetales uncl. | 0.856***  | 0.863***  | 0.861*** | 0.861*** |     | 0.862*** | 0.798**   | -0.735**  | 0.849*** | -0.827*** | 0.837*** | 0.824***  | 0.829*** | 0.847***  |         |         | -0.79**   |           |           |
| TM7                   |           |           |          |          |     |          |           |           |          |           |          |           | 0.718**  |           |         |         |           |           |           |
| Verrucomicrobia       |           |           |          |          |     |          |           |           |          |           |          |           |          | 0.71**    |         |         |           |           |           |
| Unclassified          | -0.847*** | -0.855*** | -0.795** | -0.787** |     | -0.787** | -0.746**  |           | -0.814** | 0.776**   | -0.8**   | -0.839*** | -0.796** | -0.888*** |         |         | 0.779**   |           |           |

**Table.S9 Pearson correlation between soil parameters and the substrate utilization patterns (Biolog Ecoplates).** The r-value is provided for significant correlations (\*\*P<0.01 and \*\*\*P<0.001).

|                                   | pH        | Hum      | N.total   | C.total   | C.N | OM        | Limestone | ATE       | CEC       | H.        | Ca        | K         | Mg        | Na        | P.Duch. | P.Olsen | Mn       | Al | Fe        |
|-----------------------------------|-----------|----------|-----------|-----------|-----|-----------|-----------|-----------|-----------|-----------|-----------|-----------|-----------|-----------|---------|---------|----------|----|-----------|
| pyruvic.acid.methyl.ester         |           | -0.706** |           |           |     |           |           |           |           |           |           |           |           | -0.753**  |         |         | 0.748**  |    |           |
| tween.40                          |           |          |           |           |     |           |           |           |           |           |           |           |           |           |         |         |          |    |           |
| tween.80                          |           |          |           |           |     |           |           |           |           |           |           |           |           |           |         |         |          |    |           |
| alpha.cyclodextrin                | 0.879***  | 0.889*** | 0.895***  | 0.886***  |     | 0.886***  | 0.935***  | -0.812*** | 0.883***  | -0.848*** | 0.881***  | 0.877***  | 0.834***  | 0.85***   |         |         |          |    | -0.793**  |
| glycogen                          | 0.861***  | 0.792**  | 0.738**   | 0.721**   |     | 0.721**   | 0.81***   | -0.824*** | 0.82***   | -0.876*** | 0.825***  | 0.803**   |           | 0.77**    |         |         |          |    | -0.749**  |
| D.celluliose                      |           |          |           |           |     |           |           |           |           |           |           |           |           |           |         |         |          |    |           |
| alpha.D.Lactose                   |           |          |           |           |     |           |           |           |           |           |           |           |           |           |         |         |          |    |           |
| beta.methyl.D.glucoside           |           |          |           |           |     |           |           |           |           |           |           |           |           |           |         |         |          |    |           |
| D.xylose                          |           |          |           |           |     |           |           |           |           |           |           |           |           |           |         |         |          |    |           |
| i.Erythritol                      |           |          |           |           |     |           |           |           |           |           |           |           |           |           |         |         |          |    |           |
| D.Mannitol                        |           |          |           |           |     |           |           |           |           |           |           |           |           |           |         |         |          |    |           |
| N.Acetyl.D.Glucosamine            |           |          |           |           |     |           |           |           |           |           |           |           |           |           |         |         |          |    |           |
| D.Glucosaminidic.acid             |           |          |           |           |     |           |           |           |           |           |           |           |           |           |         |         |          |    |           |
| Glucose.1.phosphate               |           |          |           |           |     |           |           |           |           |           |           |           |           |           |         |         |          |    |           |
| Glycerol.phosphate                |           |          |           |           |     |           |           |           |           |           |           |           |           |           |         |         |          |    |           |
| D.galactonique.acid.gamma.lactone |           |          |           |           |     |           |           |           |           |           |           |           |           |           |         |         |          |    |           |
| D.galacturonic.acid               | -0.909*** | -0.92*** | -0.866*** | -0.852*** |     | -0.852*** | -0.846*** | 0.713**   | -0.887*** | 0.851***  | -0.873*** | -0.911*** | -0.845*** | -0.931*** |         |         | 0.903*** |    |           |
| X2.Hydroxy.benzoic.acid           | 0.841***  | 0.768**  |           |           |     |           | 0.811***  | -0.775**  | 0.792**   | -0.839*** | 0.797**   | 0.799**   |           | 0.774**   |         |         |          |    | -0.738**  |
| X4.Hydroxy.benzoic.acid           |           |          |           |           |     |           |           |           |           |           |           |           |           |           |         |         |          |    |           |
| Hydroxybutiric.acid               |           |          |           |           |     |           |           |           |           |           |           |           |           |           |         |         |          |    |           |
| Itaconic.acid                     |           |          |           |           |     |           |           |           |           |           |           |           |           |           |         |         |          |    |           |
| ketobutyric.acid                  |           |          |           |           |     |           |           |           |           |           |           |           |           |           |         |         |          |    | 1***      |
| malic.acid                        |           |          |           |           |     |           |           |           |           |           |           |           |           |           |         |         |          |    |           |
| arginine                          |           |          |           |           |     |           |           |           |           |           |           |           |           |           |         |         |          |    |           |
| asparagine                        |           | -0.706** | -0.708**  | -0.711**  |     | -0.711**  |           |           |           |           |           |           | -0.726**  | -0.742**  |         |         |          |    |           |
| phenylalanine                     |           |          |           |           |     |           |           |           |           |           |           |           |           |           |         |         |          |    |           |
| serine                            |           |          |           |           |     |           |           |           |           |           |           |           |           |           |         |         |          |    |           |
| threonine                         |           |          |           |           |     |           |           |           |           |           |           |           |           |           |         |         |          |    |           |
| glutamic.acid                     |           |          |           | 0.709**   |     | 0.709**   |           |           |           |           |           |           | 0.741**   |           |         |         |          |    |           |
| phenylethylamine                  |           |          |           |           |     |           |           |           |           |           |           |           |           |           |         |         |          |    |           |
| putrescine                        | 0.853***  | 0.822*** | 0.849***  | 0.833***  |     | 0.833***  | 0.846***  | -0.938*** | 0.874***  | -0.887*** | 0.887***  | 0.852***  | 0.715**   | 0.715**   |         |         |          |    | -0.935*** |

**Table.S10 Pearson correlation between the bacterial diversity and the substrate utilization patterns (Biolog Ecoplates).** The r-value is provided for significant correlations (\*\*P<0.01 and \*\*\*P<0.001).

|                                   | Acidobacteria | Bacteroidetes | Chloroflexi | Firmicutes | Gemmatimonadetes | Nitrospira | Alphaproteobacteria | Betaproteobacteria | Deltaproteobacteria | Gammaproteobacteria | Proteobacteria uncl. | Acidimicrobiales | Actinomycetales | Solirubrobacterales | Actinomycetales uncl. | TM7 | Verrucomicrobia | Unclassified |
|-----------------------------------|---------------|---------------|-------------|------------|------------------|------------|---------------------|--------------------|---------------------|---------------------|----------------------|------------------|-----------------|---------------------|-----------------------|-----|-----------------|--------------|
| pyruvic.acid.methyl.ester         |               |               | -0.562**    |            |                  |            |                     |                    |                     |                     |                      |                  |                 |                     |                       |     |                 |              |
| tween.40                          |               |               |             |            | -0.634***        | -0.611**   |                     |                    | -0.611**            |                     |                      |                  |                 |                     |                       |     |                 | -0.542**     |
| tween.80                          |               |               |             |            | -0.649***        | -0.562**   |                     |                    | -0.562**            |                     |                      |                  | 0.587**         |                     |                       |     |                 | -0.558**     |
| alpha.cyclodextrin                |               | 0.607**       |             | 0.56**     |                  | 0.588**    |                     | 0.631***           | 0.631***            |                     | 0.601**              | 0.555**          |                 |                     |                       |     |                 |              |
| glycogen                          | -0.734***     | 0.75***       | 0.79***     | 0.774***   | 0.722***         | 0.833***   |                     | 0.875***           | 0.882***            |                     | 0.881***             | 0.759***         |                 | 0.725***            |                       |     |                 | 0.584**      |
| D.cellulbiose                     |               |               |             |            |                  |            |                     |                    |                     |                     |                      |                  |                 |                     |                       |     |                 |              |
| alpha.D.Lactose                   |               |               |             |            |                  |            |                     |                    |                     |                     |                      |                  |                 |                     |                       |     |                 |              |
| beta.methyl.D.glucoside           |               |               |             |            |                  |            |                     |                    |                     |                     |                      |                  |                 |                     |                       |     |                 |              |
| D.xylose                          |               |               |             |            |                  |            |                     |                    |                     |                     |                      |                  |                 |                     |                       |     |                 |              |
| i.Erythritol                      |               |               |             |            |                  |            |                     |                    |                     |                     |                      |                  |                 |                     |                       |     |                 |              |
| D.Mannitol                        |               |               |             |            |                  |            |                     |                    |                     |                     |                      |                  |                 |                     |                       |     |                 |              |
| N.Acetyl.D.Glucosamine            |               |               |             |            |                  |            |                     |                    |                     |                     |                      |                  |                 |                     |                       |     |                 |              |
| D.Glucosaminidic.acid             |               |               |             |            |                  |            |                     |                    |                     |                     |                      |                  |                 |                     |                       |     |                 |              |
| Glucose.1.phosphate               |               |               |             |            |                  |            |                     |                    |                     |                     |                      |                  |                 |                     |                       |     |                 |              |
| Glycerol.phosphate                |               |               | 0.582**     |            | 0.545**          |            |                     |                    | 0.531**             |                     |                      |                  | -0.606**        |                     |                       |     |                 |              |
| D.galactonique.acid.gamma.lactone |               |               |             |            |                  |            |                     |                    |                     |                     |                      |                  |                 |                     |                       |     |                 |              |
| D.galacturonic.acid               |               |               |             |            |                  |            |                     |                    |                     |                     |                      |                  |                 |                     |                       |     |                 |              |
| X2.Hydroxy.benzoic.acid           | -0.539**      | 0.616**       | 0.568**     | 0.682***   | 0.571**          | 0.661***   |                     | 0.651***           | 0.701***            |                     | 0.642***             | 0.571**          |                 | 0.704***            |                       |     |                 |              |
| X4.Hydroxy.benzoic.acid           |               |               |             |            |                  |            |                     |                    |                     |                     |                      |                  |                 |                     |                       |     |                 |              |
| Hydroxybutiric.acid               |               |               |             |            |                  |            |                     |                    |                     |                     |                      |                  |                 |                     |                       |     |                 |              |
| Itaconic.acid                     |               |               |             |            |                  |            |                     |                    |                     |                     |                      |                  |                 |                     |                       |     |                 |              |
| ketobutyric.acid                  |               |               |             |            |                  |            |                     |                    |                     |                     |                      |                  |                 |                     |                       |     |                 | 0.518**      |
| malic.acid                        |               |               |             |            | 0.562**          |            |                     |                    |                     |                     |                      |                  |                 |                     |                       |     |                 |              |
| arginine                          |               |               |             |            |                  |            |                     |                    |                     |                     |                      |                  |                 |                     |                       |     |                 | 0.58**       |
| asparagine                        |               |               | -0.567**    | -0.543**   | -0.664***        | -0.576**   |                     | -0.523**           | -0.601**            |                     | -0.535**             |                  | 0.72***         |                     |                       |     |                 |              |
| phenylalanine                     |               |               |             |            |                  |            |                     |                    |                     |                     |                      |                  |                 |                     |                       |     |                 |              |
| serine                            |               |               |             |            |                  |            |                     |                    |                     |                     |                      |                  |                 |                     |                       |     |                 |              |
| threonine                         |               |               |             |            |                  |            |                     |                    |                     |                     |                      |                  |                 |                     |                       |     |                 | 0.525**      |
| glutamic.acid                     |               |               |             |            |                  |            |                     |                    |                     |                     |                      |                  |                 |                     |                       |     |                 |              |
| phenylethylamine                  |               | 0.52**        | 0.634***    | 0.659***   | 0.604**          |            |                     | 0.571**            | 0.644***            |                     | 0.599**              |                  |                 | 0.596**             |                       |     |                 |              |
| putrescine                        | -0.704***     | 0.77***       | 0.703***    | 0.774***   |                  | 0.7**      |                     | 0.779***           | 0.761***            |                     | 0.787***             | 0.719***         |                 | 0.772***            | 0.648***              |     |                 |              |
